1 **Topology, cross-frequency, and same-frequency band interactions**  
2 **shape the generation of phase-amplitude coupling in a neural mass**  
3 **model of a cortical column**

4  
5 **Roberto C. Sotero**

6 Hotchkiss Brain Institute, Department of Radiology, University of Calgary, Calgary, AB, Canada

7

8 **Correspondence:** Roberto C. Sotero, Department of Radiology and Hotchkiss Brain Institute,  
9 University of Calgary, 3330 Hospital Drive NW, HSC Building, Room 2923. Calgary, Alberta,  
10 T2N 4N1. Canada

11 [roberto.soterodiaz@ucalgary.ca](mailto:roberto.soterodiaz@ucalgary.ca)

12

13

14

15

16

17

18

19

20

21

22

23

24 **Abstract**

25 Phase-amplitude coupling (PAC), a type of cross-frequency coupling (CFC) where the phase of a  
26 low-frequency rhythm modulates the amplitude of a higher frequency, is becoming an important  
27 indicator of information transmission in the brain. However, the neurobiological mechanisms  
28 underlying its generation remain undetermined. A realistic, yet tractable computational model of  
29 the phenomenon is thus needed. Here we propose a neural mass model of a cortical column,  
30 comprising fourteen neuronal populations distributed across four layers (L2/3, L4, L5 and L6).  
31 The conditional transfer entropies (cTE) from the phases to the amplitudes of the generated  
32 oscillations are estimated by means of the conditional mutual information. This approach  
33 provides information regarding directionality by distinguishing PAC from APC (amplitude-  
34 phase coupling), i.e. the information transfer from amplitudes to phases, and can be used to  
35 estimate other types of CFC such as amplitude-amplitude coupling (AAC) and phase-phase  
36 coupling (PPC). While experiments often only focus on one or two PAC combinations (e.g.,  
37 theta-gamma or alpha-gamma), we found that a cortical column can simultaneously generate  
38 almost all possible PAC combinations, depending on connectivity parameters, time constants,  
39 and external inputs. We found that the strength of PAC between two populations was strongly  
40 correlated with the strength of the effective connections between them and, on average, did not  
41 depend upon the presence or absence of a direct (anatomical) connection. When considering a  
42 cortical column circuit as a complex network, we found that neuronal populations making  
43 indirect PAC connections had, on average, higher local clustering coefficient, efficiency, and  
44 betweenness centrality than populations making direct connections and populations not involved  
45 in PAC connections. This suggests that their interactions were more efficient when transmitting  
46 information. Since more than 60% of the obtained interactions represented indirect connections,

47 our results highlight the importance of the topology of cortical circuits for the generation of the  
48 PAC phenomenon. Finally, our results demonstrated that indirect PAC interactions can be  
49 explained by a cascade of direct CFC and same-frequency band interactions, suggesting that  
50 PAC analysis of experimental data should be accompanied by the estimation of other types of  
51 frequency interactions for an integrative understanding of the phenomenon.

52

53 Keywords: neural mass models; phase-amplitude coupling; cross-frequency coupling; cortical  
54 column; conditional mutual information; conditional transfer entropy; complex networks

55

56

57

58

59

60

61

62

63

64

65

66

67

68

69

70

## 71 **1. Introduction**

72 It has been hypothesized that phase-amplitude coupling (PAC) of neurophysiological signals  
73 plays a role in the shaping of local neuronal oscillations and in the communication between  
74 cortical areas (Canolty and Knight 2010). PAC occurs when the phase of a low frequency  
75 oscillation modulates the amplitude of a higher frequency oscillation. A classic example of this  
76 phenomenon was demonstrated in the CA1 region of the hippocampus (Bragin, Jando et al.  
77 1995), where the phase of the theta band modulated the power of the gamma-band.  
78 Computational models of the theta-gamma PAC generation in the hippocampus have been  
79 proposed (Kopell, Boegers et al. 2010) and are based on two main types of models. The first  
80 type of models consists of a network of inhibitory neurons (I-I model) (White, Banks et al.  
81 2000), whereas the second model is based on the reciprocal connections between networks of  
82 excitatory pyramidal cells and inhibitory neurons (E-I model) (Tort, Rotstein et al. 2007, Kopell,  
83 Boegers et al. 2010). In such models, fast excitation and delayed feedback inhibition alternate,  
84 and with appropriate strength of excitation and inhibition, oscillatory behavior occurs. When the  
85 gamma activity produced by the E-I or I-I models is periodically modulated by a theta rhythm  
86 imposed by either an external source or theta resonant cells within the network (White, Banks et  
87 al. 2000), a theta-gamma PAC is produced. Recently, the generation of theta-gamma PAC was  
88 studied (Onslow, Jones et al. 2014) using a neural mass model (NMM) proposed by Wilson and  
89 Cowan (Wilson and Cowan 1972). In NMMs, spatially averaged magnitudes are assumed to  
90 characterize the collective behavior of populations of neurons of a given type instead of  
91 modeling single cells and their interactions in a realistic network (Wilson and Cowan 1972,  
92 Jansen and Rit 1995). Specifically, the Wilson and Cowan model consists of excitatory and  
93 inhibitory neural populations which are mutually connected.

94 While the models mentioned above have improved our understanding of the physiological  
95 mechanism that gives rise to theta-gamma PAC, we lack modeling insights into the generation of  
96 PAC involving other frequency pairs (Sotero 2015). This is critical because experimental studies  
97 have shown that the PAC phenomenon is not restricted to either the hippocampus or to theta-  
98 gamma interactions. In fact, PAC has been detected in pairs involving all possible combinations  
99 of low and high frequencies: delta-theta (Lakatos, Shah et al. 2005), delta-alpha (Cohen, Elger et  
100 al. 2009, Ito, Maldonado et al. 2013), delta-beta (Cohen, Elger et al. 2009, Nakatani, Raffone et  
101 al. 2014), delta-gamma (Gross, Hoogenboom et al. 2013, Lee and Jeong 2013, Nakatani, Raffone  
102 et al. 2014, Szczepanski, Crone et al. 2014, Florin and Baillet 2015), theta-alpha (Cohen, Elger et  
103 al. 2009), theta-beta (Cohen, Elger et al. 2009, Nakatani, Raffone et al. 2014), theta-gamma  
104 (Lakatos, Shah et al. 2005, Demiralp, Bayraktaroglu et al. 2007, Wang, Li et al. 2011,  
105 Durschmid, Zaehle et al. 2013, Lee and Jeong 2013, McGinn and Valiante 2014, Florin and  
106 Baillet 2015), alpha-beta (Sotero, Bortel et al. 2015), alpha-gamma (Osipova, Hermes et al.  
107 2008, Voytek, Canolty et al. 2010, Spaak, Bonnefond et al. 2012, Wang, Saalman et al. 2012),  
108 and beta-gamma (Wang, Saalman et al. 2012, de Hemptinne, Ryapolova-Webb et al. 2013).  
109 Furthermore, although experimental studies usually focus on one or two PAC combinations,  
110 most of the combinations mentioned above can be detected in a single experiment (Sotero, Bortel  
111 et al. 2015). This suggests a diversity and complexity of the PAC phenomenon that has not been  
112 incorporated into current computational models. Similarly, there is a need for further  
113 improvement in the mathematical methods used to detect PAC. Although a large number of  
114 methods have been proposed (Penny, Duzel et al. 2008, Tort, Komorowski et al. 2010), no gold  
115 standard has emerged.

116 In this work, we propose a neural mass model of a cortical column that comprises 4 cortical  
117 layers and 14 neuronal populations and study the simultaneous generation of all PAC  
118 combinations mentioned above. To estimate PAC we use a measure of the information transfer  
119 from the phase of the low frequency rhythm to the amplitude of the higher frequency oscillation,  
120 which is known as conditional transfer entropy (cTE) (Lizier, Heinzle et al. 2011). This  
121 multivariate approach provides information about the directionality of the interactions, thus  
122 distinguishing PAC from the information transfer from the amplitude to the phases (i.e.  
123 amplitude-phase coupling, or APC) which has been experimentally detected (Jiang,  
124 Bahramisharif et al. 2015). This done in contrast to previous methods which were either based on  
125 pairwise correlations between the selected phase and amplitude (Canolty, Edwards et al. 2006,  
126 Penny, Duzel et al. 2008), or provided directionality using pairwise approaches (Jiang,  
127 Bahramisharif et al. 2015), or were multivariate but did not provide directionality (Canolty,  
128 Cadieu et al. 2012). By estimating cTE from phases to amplitudes, we obtain a clearer view of  
129 the mechanisms underlying the generation of PAC in the cortical column which allows us to  
130 study the link between anatomical and effective PAC structure. In the examples shown in this  
131 paper, the neuronal populations modeled have natural frequencies in the theta, alpha and gamma  
132 bands. However, due to the effective connectivity between populations, oscillations in the delta  
133 and beta bands appear and result in PAC involving these frequencies. We focused on three  
134 combinations (delta-gamma, theta-gamma, and alpha-gamma) and explored how changes in  
135 model parameters such as the strength of the connections, time constants or external inputs  
136 strengthen or weaken the PAC phenomenon. We found that more than 60% of the obtained PAC  
137 interactions result from indirect connections and that, on average, these interactions have the  
138 same strength as direct (anatomical) connections. The cortical column circuit was analyzed as a

139 complex network and three different local topological measures were computed: the clustering  
140 coefficient ( $C_m$ ), the efficiency ( $E_m$ ) and betweenness centrality ( $B_m$ ) which quantify how  
141 efficiently the information is transmitted within the network. According to our results, neuronal  
142 populations sending direct PAC connections had higher local  $C_m$ ,  $E_m$ , and  $B_m$  coefficients, than  
143 populations receiving the PAC connection and populations not involved in PAC interactions.  
144 This suggests that the topology of cortical circuits plays a central role in the generation of the  
145 PAC phenomenon.

146 Finally, although this paper focuses on the PAC phenomenon, in order to study the generation of  
147 indirect PAC connections we also estimated other types of cross-frequency coupling such as  
148 APC, amplitude-amplitude coupling (AAC), and phase-phase coupling (PPC), as well as  
149 interactions within the same frequency band (or same-frequency coupling, SFC), and used these  
150 as predictors of indirect PAC in a linear regression analysis. We demonstrated that indirect PAC  
151 connections can be predicted by a cascade of direct CFC and SFC interactions, suggesting that  
152 PAC analysis of experimental data should be accompanied by the estimation of other types of  
153 interactions for an integrative understanding of the phenomenon.

154 A list of the abbreviations used in this paper is presented in Table 1.

155

## 156 **2. Methods**

### 157 **2.1. A neural mass model of a cortical column**

158 Figure 1 shows the proposed model obtained by distributing four cell classes in four cortical  
159 layers (L2/3, L4, L5, and L6). This produced 14 different neuronal populations, since not all cell  
160 types are present in each layer (Neymotin, Jacobs et al. 2011). Excitatory neurons were either  
161 regular spiking (RS) or intrinsically bursting (IB), and inhibitory neurons were either fast-spiking

162 (FS), or low-threshold spiking (LTS) neurons. The evolution of each population dynamics rests  
163 on two mathematical operations. Post-synaptic potentials (PSP) at the axonal hillock were  
164 converted into an average firing rate using the sigmoid function:

$$165 \quad S(x) = \frac{e_0}{1 + e^{r(v_0 - x)}} \quad (1)$$

166 where the variable  $x$  represents the PSP and parameters  $e_0$ ,  $v_0$  and  $r$  represent the maximal firing  
167 rate, the PSP corresponding to the maximal firing rate  $e_0$ , and the steepness of the sigmoid  
168 function, respectively. The second operation was the conversion of firing rate at the soma and  
169 dendrites into PSP, which was done by means of a linear convolution with an impulse response  
170  $g(t)$  given by:

$$171 \quad g(t) = Gkte^{-kt} \quad (2)$$

172 where  $G$  controls the maximum amplitude of PSP and  $k$  is the sum of the reciprocal of the  
173 average time constant (Jansen and Rit 1995). The convolution model with impulse response (2)  
174 can be transformed into a second order differential equation (Jansen and Rit 1995, Sotero,  
175 Trujillo-Barreto et al. 2007). The temporal dynamics of the average PSP in each neuronal  
176 population  $x_m$  can then be obtained by solving a system of 14 second order differential  
177 equations:

$$178 \quad \frac{d^2 x_m(t)}{dt^2} = -2k_m b_m \frac{dx_m(t)}{dt} - k_m^2 x_m(t) + G_m k_m (p_m + \sum_{n=1}^{14} \Gamma_{nm} S(x_n(t))) \quad (3)$$

179 where  $n = 1, \dots, 14$  and  $m = 1, \dots, 14$ . The populations are numbered from 1 to 14 following the  
180 order: [L2RS, L2IB, L2LTS, L2FS, L4RS, L4LTS, L4FS, L5RS, L5IB, L5LTS, L5FS, L6RS,  
181 L6LTS, L6FS]. Notice that layer 2/3 was simply labelled as L2. As can be seen in (3), neuronal  
182 populations interact via the connectivity matrix  $\Gamma_{nm}$ . This is an ‘anatomically constrained’  
183 effective connectivity matrix (Sotero, Bortel et al. 2010) in the sense that its elements represent  
184 anatomical (i.e., direct) connections, but their strength (except the ones set to zero) can vary with



185 a condition or task. Inputs from neighboring columns are accounted for via  $p_m$ , which can be any  
186 arbitrary function, including white noise (Jansen and Rit 1995). Thus, equation (3) represents a  
187 system of 14 random differential equations (Carbonell, Jimenez et al. 2005).

188 The ‘damping’ parameter  $b_m$  critically determines the behavior of the system. If the connections  
189 between the populations are set to zero ( $\Gamma_{nm} = 0, n \neq m$ ), then for  $b_m > 1$  (overdamped  
190 oscillator) and  $b_m = 1$  (critically damped oscillator), each neuronal population will evolve to a  
191 fixed point ( $\frac{dx_m(t)}{dt} = 0$ ) without oscillating. If  $b_m < 1$  (underdamped oscillator), each population  
192 is capable of producing oscillations even if the inter-population coupling is set to zero. The case  
193  $b_m = 1$  corresponds to the Jansen and Rit model (Jansen and Rit 1995), which has been  
194 extensively used in the literature (David and Friston 2003, Grimbert and Faugeras 2006, Zavaglia,  
195 Astolfi et al. 2006, Sotero, Trujillo-Barreto et al. 2007, Sotero and Trujillo-Barreto 2008, Valdes-  
196 Sosa, Sanchez-Bornot et al. 2009, Ursino, Cona et al. 2010, Zavaglia, Cona et al. 2010). Thus, in  
197 this model, an individual population is not capable of oscillating, and the balance between  
198 excitation and inhibition is what produces oscillatory behavior that mimics observed  
199 Electroencephalography (EEG) signals. It should be noted that realistic models of a single  
200 inhibitory neural population are able to produce oscillations (Wang and Buzsaki 1996), but that  
201 excitatory populations were believed to only produce unstructured population bursts (Buzsáki  
202 2006). This view has been challenged recently by both experimental and computational studies  
203 (Allene, Cattani et al. 2008, Tattini, Olmi et al. 2012). To account for the possibility of oscillatory  
204 activity in single populations, we introduced the parameter  $b_m$  with values  $b_m < 1$ . Tables 1 and  
205 2 present the parameters of the model and their interpretation. As shown in table 2, FS  
206 populations have the fastest time constants, followed by IB, RS, and LTS, in that order.

207

208 **Table 1.** List of abbreviations.

| Abbreviation | Meaning                        |
|--------------|--------------------------------|
| AAC          | Amplitude-amplitude coupling   |
| APC          | Amplitude-phase coupling       |
| CFC          | Cross-frequency coupling       |
| cMI          | Conditional mutual information |
| cTE          | Conditional transfer entropy   |
| ECoG         | Electrocorticography           |
| EEG          | Electroencephalography         |
| ESC          | Envelope-to-signal correlation |
| FS           | Fast-spiking                   |
| IB           | Intrinsically bursting         |
| LFP          | Local field potential          |
| LTS          | Low-threshold                  |
| Midx         | Modulation index               |
| NMM          | Neural mass model              |
| PAC          | Phase-amplitude coupling       |
| PFC          | Phase-frequency coupling       |
| PPC          | Phase-phase coupling           |
| PSP          | Postsynaptic potential         |
| RS           | Regular spiking                |
| SFC          | Same-frequency coupling        |

209

210

211 **Table 2.** Values and physiological interpretations of model parameters for the 14 neuronal

212 populations.

| Parameter (units) | Interpretation              | Value                                                                                                                                                                   | Reference                                                                             |
|-------------------|-----------------------------|-------------------------------------------------------------------------------------------------------------------------------------------------------------------------|---------------------------------------------------------------------------------------|
| $G$ (mV)          | Gain                        | $G_1 = 3.25, G_2 = 3.25, G_3 = 30, G_4 = 10, G_5 = 3.25, G_6 = 30, G_7 = 10, G_8 = 3.25, G_9 = 3.25, G_{10} = 30, G_{11} = 10, G_{12} = 3.25, G_{13} = 30, G_{14} = 10$ | (Jansen and Rit 1995, Wendling, Bellanger et al. 2000, Zavaglia, Astolfi et al. 2006) |
| $k$ ( $s^{-1}$ )  | Reciprocal of time constant | $k_1 = 60, k_2 = 70, k_3 = 30, k_4 = 350, k_5 = 60, k_6 = 30, k_7 = 350, k_8 = 60, k_9 = 70, k_{10} = 30, k_{11} = 350, k_{12} = 60, k_{13} = 30, k_{14} = 350$         | (Jansen and Rit 1995, Wendling, Bellanger et al. 2000, Zavaglia, Astolfi et al. 2006) |
| $p$               | External input              | $p_i = 0$ for $i \neq \{5,7\}, p_5 = 500, p_7 = 150$                                                                                                                    | -                                                                                     |

|               |                                   |                                 |                       |
|---------------|-----------------------------------|---------------------------------|-----------------------|
| $b$           | Damping coefficient               | $b = 0.001$ for all populations | -                     |
| $e_0(s^{-1})$ | Maximum firing rate               | $e_0 = 5$ for all populations   | (Jansen and Rit 1995) |
| $v_0(mV)$     | Position of the sigmoid function  | $v_0 = 6$ for all populations   | (Jansen and Rit 1995) |
| $r(mV^{-1})$  | Steepness of the sigmoid function | $r = 0.56$ for all populations  | (Jansen and Rit 1995) |

213  
 214 **Table 3.** Standard values of the anatomically constrained effective connectivity matrix  $\Gamma_{nm}$   
 215 (Figure 1B). All values represent anatomical (direct) connections. Nonzero values were manually  
 216 tuned to produce peaks in the spectrum of  $x_m(t)$  in all frequencies of interest (from delta to  
 217 gamma) as well as an average LFP spectrum (Figure 6) consistent with experimental results  
 218 (Maier, Adams et al. 2010, Buffalo, Fries et al. 2011). Values that are zero were taken from the  
 219 literature (Neymotin, Jacobs et al. 2011).

220

| From<br>↓ | To<br>→ | L2/3   |        |        |       | L4     |        |        | L5     |        |        |        | L6     |        |        |
|-----------|---------|--------|--------|--------|-------|--------|--------|--------|--------|--------|--------|--------|--------|--------|--------|
|           |         | RS     | IB     | LTS    | FS    | RS     | LTS    | FS     | RS     | IB     | LTS    | FS     | RS     | LTS    | FS     |
| L2/3      | RS      | 19.23  | 12.53  | 34.17  | 14.07 | 1.61   | 0      | 0      | 3.82   | 1.61   | 0      | 0      | 0      | 0      | 0      |
|           | IB      | 12.53  | 12.53  | 27.47  | 14.07 | 1.61   | 0      | 0      | 3.82   | 1.61   | 0      | 0      | 0      | 0      | 0      |
|           | LTS     | -23.45 | -23.45 | -52.93 | -6.70 | 0      | 0      | 0      | -23.45 | -33.50 | 0      | -16.75 | -16.75 | 0      | -11.39 |
|           | FS      | -3.35  | -5.36  | -6.03  | -20.1 | 0      | 0      | 0      | -3.35  | -6.70  | 0      | -2.01  | -3.35  | 0      | -2.01  |
| L4        | RS      | 9.72   | 0      | 0      | 0     | 22.98  | 34.17  | 58.96  | 7.77   | 8.17   | 0      | 0      | 2.14   | 0      | 0      |
|           | LTS     | 0      | 0      | 0      | 0     | -23.45 | -52.93 | -8.71  | 0      | 0      | 0      | 0      | 0      | 0      | 0      |
|           | FS      | 0      | 0      | 0      | 0     | -6.03  | -6.03  | -61.64 | 0      | 0      | 0      | 0      | 0      | 0      | 0      |
| L5        | RS      | 1.47   | 0      | 0      | 0     | 0.47   | 0      | 0      | 32.89  | 5.36   | 20.77  | 8.71   | 2.14   | 0      | 0      |
|           | IB      | 1.21   | 0      | 0      | 0     | 0.47   | 0      | 0      | 1.14   | 46.90  | 20.77  | 8.71   | 4.69   | 0      | 0      |
|           | LTS     | -23.45 | 0      | 0      | 0     | 0      | 0      | 0      | -23.45 | -23.45 | -52.93 | -2.01  | -16.75 | 0      | -5.36  |
|           | FS      | 0      | 0      | 0      | 0     | 0      | 0      | 0      | -2.68  | -2.68  | -2.68  | -61.64 | 0      | 0      | 0      |
| L6        | RS      | 0      | 0      | 0      | 0     | 0      | 0      | 0      | 0.40   | 1.88   | 0      | 0      | 48.78  | 34.17  | 15.41  |
|           | LTS     | -23.45 | 0      | 0      | 0     | 0      | 0      | 0      | -16.75 | -16.75 | 0      | -5.36  | -23.45 | -66.33 | -8.71  |
|           | FS      | 0      | 0      | 0      | 0     | 0      | 0      | 0      | 0      | 0      | 0      | 0      | -9.38  | -29.48 | -28.14 |

221  
 222 **2.2. Estimation of phase-amplitude coupling**  
 223 Several mathematical methods for detecting PAC have been proposed (Penny, Duzel et al. 2008,  
 224 Canolty and Knight 2010, Tort, Komorowski et al. 2010, Canolty, Cadieu et al. 2012, Jiang,  
 225 Bahramisharif et al. 2015), although each yields advantages and caveats, such that no gold

226 standard for the detection of PAC has emerged. Although diverse, the basis for these methods is  
227 to test the correlation between the instantaneous phase of a lower frequency rhythm and the  
228 instantaneous amplitude of the higher frequency rhythm. To compute any one of these measures,  
229 signals generated with the model (3) need to be band-pass filtered into different frequency bands.  
230 In this paper we use the following bands: delta (0.1–4 Hz), theta (4–8 Hz), alpha (8–12 Hz), beta  
231 (12–30 Hz), and gamma (30–120 Hz). To this end, we designed FIR filters using MATLAB’s  
232 signal processing toolbox function *firls.m*. To remove any phase distortion, the filters were  
233 applied to the original time series in the forward and then the reverse direction using MATLAB’s  
234 function *filtfilt.m* (Penny, Duzel et al. 2008). The analytic representation  $y_{mk}(t)$  of each filtered  
235 signal  $x_{mk}$  (where  $m = 1, \dots, 5$  stands for the index of the frequency band, and  $k = 1, \dots, 14$ , indexes  
236 the neuronal populations) was obtained using the Hilbert transform  $\text{Hilbert}(x_{mk}(t))$ :

$$237 \quad y_{mk}(t) = x_{mk}(t) + i\text{Hilbert}(x_{mk}(t)) = a_{mk}(t)e^{i\varphi_{mk}(t)} \quad (4)$$

238 where  $a_{mk}(t)$  and  $\varphi_{mk}(t)$  are the instantaneous amplitudes and phases, and  $i$  is the imaginary  
239 number. Amplitudes were normalized by subtracting the temporal mean and dividing the result by  
240 the temporal standard deviation to create the set of normalized band-passed signals.  
241 Normalization was done to facilitate comparison between different frequency bands.

242 Two examples of PAC measures frequently used in the literature are the modulation index (Midx)  
243 (Canolty, Edwards et al. 2006) and the envelope-to-signal correlation (ESC) (Penny, Duzel et al.  
244 2008):

$$245 \quad \text{Midx} = \left| \sum_t a_{nl}(t)e^{i\varphi_{mk}(t)} \right| \quad (5)$$

$$246 \quad \text{ESC} = \text{corr}(\cos(\varphi_{mk}(t)), a_{nl}(t)) \quad (6)$$

247 where subindexes  $m$  and  $n$  corresponds to different frequency bands and subindexes  $k$  and  $l$   
248 correspond to different neuronal populations. However, ESC and Midx are pairwise measures of

249 the correlation between phases and amplitudes and thus cannot detect directionality in the  
250 interaction. Measures such as cTE (Lizier, Heinzle et al. 2011) which are based on the  
251 information transmitted between signals should provide a clearer picture of the mechanisms  
252 generating PAC than correlation-based measures. cTE can be computed using the conditional  
253 mutual information (cMI) measure (MacKay 2003). First, we define the cMI between the  
254 phase  $\varphi_{mk}$  and the amplitude  $a_{nl}$ , given all the other phases ( $\Phi$ ) and amplitudes (A) as:

$$255 \quad cMI(\varphi_{mk}, a_{nl} | M) = H(\varphi_{mk} | M) - H(\varphi_{mk} | a_{nl}, M) \quad (7)$$

256 where  $M = [\Phi, A]$  is a matrix comprising all phases and amplitudes in all populations, except  
257  $\varphi_{mk}$  and  $a_{nl}$ , and the two terms at the right side of the equation are conditional entropies  
258 (MacKay 2003). To compute cMI we use a toolbox  
259 (<http://www.cs.man.ac.uk/~pococka4/MITtoolbox.html>) which computes several information  
260 measures using the conditional likelihood maximization algorithm (Brown, Pocock et al. 2012).  
261 cMI does not provide information about the directionality of the coupling between phases and  
262 amplitudes, which is a problem because both theoretical (Daffertshofer and van Wijk 2011) and  
263 experimental (Jiang, Bahramisharif et al. 2015) studies indicate the possibility of an information  
264 flow from amplitudes to phases. On the other hand, cTE provides directionality by estimating the  
265 cMI between one signal (the phase in our case) and the other signal (the amplitude) shifted  $\delta$  steps  
266 into the future. In this paper, to estimate cTE from the phase to the amplitude (denoted as  
267  $cTE_{\varphi_{mk} \rightarrow a_{nl}}$ ), we compute cMI for  $N$  different  $\delta$ s and average the results (Palus, Komarek et al.  
268 2001, Palus and Stefanovska 2003, Lizier, Heinzle et al. 2011) :

$$269 \quad cTE_{\varphi_{mk} \rightarrow a_{nl}} = \frac{1}{N} \sum_{\delta=1}^N cMI(\varphi_{mk}, a_{nl}^{\delta} | \tilde{M})$$

270 (8)

271 where  $a_{nl}^\delta$  is derived from the amplitude time series  $a_{nl}$  at  $\delta$  steps into the future, i.e.  $a_{nl}^\delta =$   
272  $a_{nl}(t + \delta)$ , and  $\tilde{M}$  is a matrix comprising all phases and amplitudes in all populations, except  
273  $\varphi_{mk}$ . In this paper we use  $N = 100$ . Since we use a time step of  $10^{-4}$  s in all simulations, we are  
274 averaging the *cMI* up to a period of 10 ms into the future.

275 A significance value can be attached to any of the above measures by means of a surrogate data  
276 approach (Canolty, Edwards et al. 2006, Penny, Duzel et al. 2008), where we offset  $\varphi_{mk}$  and  $a_{nl}$   
277 by a random time lag. We can thus compute 1000 surrogate Midx, ESC, cMI and cTE values.  
278 From the surrogate dataset we first compute the mean  $\mu$  and standard deviation  $\sigma$ , and then  
279 compute a z-score as:

$$280 \quad Z_1 = \frac{cMI - \mu_1}{\sigma_1}, \quad Z_2 = \frac{cMI - \mu_2}{\sigma_2}, \quad Z_3 = \frac{cMI - \mu_3}{\sigma_3}, \quad Z_4 = \frac{cTE - \mu_4}{\sigma_4} \quad (9)$$

281 The p-value that corresponds to the standard Gaussian variate is also computed. Z values  
282 satisfying  $|Z| > 1.96$  are significant with  $\alpha = 0.05$ . Masks of zeros (for non-significant Z values)  
283 and ones (for significant Z-values) are created and multiplied to Midx, ESC, cMI, and cTE.  
284 Finally, a multiple comparison analysis based on the False Discovery Rate (Storey and Tibshirani  
285 2003) is performed using the computed p-values.

### 286 **2.3. Nonlinear correlation coefficient**

287 Given the nonlinear nature of the PAC phenomenon, studying the link between the parameters of  
288 the model and the strength of PAC cannot be done with the Pearson correlation coefficient,  
289 which measures the linear correlation between two variables and is therefore not appropriate.  
290 Nonlinear measures are thus required. The underlying idea is that if the value of the variable X is  
291 considered as a nonlinear function of the variable Y, the value of Y given X can be predicted  
292 according to a nonlinear regression (Pereda, Quiroga et al. 2005). In this paper, we computed the  
293 nonlinear regression by fitting  $y(t)$  with a Fourier series:

294 
$$\hat{y}(t) = a_0 + \sum_{k=1}^N a_k \sin(b_k x(t) + c_k)$$

295 (10)

296 where we used  $N = 10$ . The nonlinear correlation coefficient  $r_{nl}$  is then the value of the linear  
297 correlation between  $y(t)$  and the predicted signal  $\hat{y}(t)$ .

#### 298 **2.4. Topological properties of the cortical column network**

299 Complex network analysis have proven useful for studying the relationship between structure  
300 and function in brain networks (Honey, Kotter et al. 2007). In this paper we are interested in  
301 studying how the topology of the connectivity matrix  $\Gamma_{nm}$  influences the PAC phenomenon.  
302 Specifically, we want to answer the question of whether the populations involved in direct and  
303 indirect PAC interactions present the same topological properties. This means we need to focus  
304 on local properties of the network instead of global ones. In this paper we are going to compute  
305 three such properties: the local clustering coefficient, the local efficiency, and the local  
306 betweenness centrality, for the sending and receiving nodes involved in each direct or indirect  
307 PAC interaction.

308 In this section we are not going to distinguish between inhibitory and excitatory connections, and  
309 the analysis will be done to the absolute value of the connectivity matrix:  $W = |\Gamma_{nm}|$ .

310 Nodes of a network can be characterized by the structure of their local neighborhood. The  
311 concept of clustering of a network refers to the tendency to form cliques in the neighborhood of  
312 any given node (Watts and Strogatz 1998). This means that if node  $m$  is connected to node  $n$ ,  
313 while at the same time node  $n$  is connected to node  $s$ , there is a high probability that node  $m$  is  
314 also connected to node  $s$ .

315 Let  $A = \{a_{mn}\}$  be the directed adjacency matrix (Albert and Barabasi 2002) of the network  
316 ( $a_{mn} = 1$  when there is a connection from  $m$  to  $n$ ,  $a_{mn} = 0$  otherwise). Let also  $d_m^{tot}$  be the

317 total degree of node  $m$ , and  $d_m^{\leftrightarrow} = \sum_{m \neq n} a_{mn} a_{nm}$ . The local clustering coefficient of node  $m$  for  
 318 weighted networks is (Fagiolo 2007):

$$319 \quad C_m = \frac{(\widehat{W} + \widehat{W}^T)_{mm}^3}{2[d_m^{\text{tot}}(d_m^{\text{tot}} - 1) - 2d_m^{\leftrightarrow}]} \quad (11)$$

320 where  $\widehat{W} = W^{1/3}$ , and  $(\widehat{W} + \widehat{W}^T)_{mm}^3$  is the  $m$ th element of the main diagonal of  $(\widehat{W} + \widehat{W}^T)^3$ .

321 The second measure we are going to compute is the local efficiency, calculated as (Latora and  
 322 Marchiori 2001, Rubinov and Sporns 2010):

$$323 \quad E_m = \frac{1}{N-1} \sum_{j, j \neq m} (\vec{l}_{mj})^{-1} \quad (12)$$

324 where  $\vec{l}_{mj}$  is the shortest weighted path length from  $m$  to  $j$ . Thus,  $E_m$  is inversely related to the  
 325 path length, and measures how efficiently the network exchanges information on a local scale.

326 To account quantitatively for the role of nodes that can be crucial for connecting different  
 327 regions of the network by acting as bridges, the concept of betweenness centrality was  
 328 introduced (Newman, Barabási et al. 2006). The local weighted betweenness centrality of node  $m$   
 329 is computed as (Rubinov and Sporns 2010) :

$$330 \quad B_m = \frac{1}{(N-1)(N-2)} \sum_{j \neq m, h \neq m, j \neq h} \frac{\rho_{hj}(m)}{\rho_{hj}}$$

331 (13)

332 where  $\rho_{hj}$  is the number of shortest paths between  $h$  and  $j$  that pass through  $m$ . A node with high  
 333 centrality is thus crucial to efficient communication.

334 To compute the  $C_m$ ,  $E_m$ , and  $B_m$  measures we use Matlab functions provided in the brain  
 335 connectivity toolbox (<https://sites.google.com/site/bctnet/>).

336

### 337 **3. Results**

#### 338 **3.1. Detecting PAC: control analysis**



339 We connected three excitatory neuronal populations, labeled 1, 2 and 3 (Figure 2A and 2B). The  
340 temporal dynamics of the three populations are described by a system of random differential  
341 equations identical to (3), but with  $n=1:3$  and  $m=1:3$ . As shown in Figure 2A, there is no  
342 connection between populations 1 and 3 and both are driven by population 2. The parameters  
343 used in this simulation were:  $G_1 = 3.25$ ,  $G_2 = 4$ ,  $G_3 = 3.25$ ,  $G_4 = 4$ ,  $k_1 = 330$ ,  $k_2 = 30$ ,  
344  $k_3 = 400$ . Inputs  $p_1, p_2$ , and  $p_3$  were white noise processes with mean 0 and standard  
345 deviations:  $\sigma_1 = \sigma_2 = \sigma_3 = 3$ . Simulated data were generated by numerically integrating system  
346 (3). To do this, the local linearization method for random systems was used (Carbonell, Jimenez  
347 et al. 2005) with an integration step of  $10^{-4}$  s.

348 Figure 2C shows the temporal dynamics of the three populations and Figure 2D displays the  
349 corresponding spectral density. Population 2 oscillates at 4.40 Hz (theta band), whereas  
350 populations 1 and 3 have peaks at 50 and 57.8 Hz, respectively (gamma band). Because of the  
351 connections  $2 \rightarrow 1$  and  $2 \rightarrow 3$ , there are peaks at 4.40 Hz in populations 1 and 3, and more  
352 importantly, there are secondary peaks at frequencies  $50\text{Hz} \pm 4.40\text{ Hz}$  and  $57.8\text{Hz} \pm 4.40\text{ Hz}$   
353 on both sides of these main peaks. This shows that the low frequency (4.40 Hz) is modulating the  
354 higher frequencies (50 and 57.8 Hz) and that there is theta-gamma PAC. According to the  
355 connections shown in Figure 2A, phases in populations 1 and 3 cannot modulate the amplitudes  
356 in populations 3 and 1, respectively. Thus, an appropriate method to study the generation of PAC  
357 should not detect any modulation between populations 1 and 3. We found that when the sigmoid  
358 function is replaced by the linear function  $S(x)=x$ , no modulation is obtained (Figure 2E).

359 Figure 3A shows the PAC computed using the four measures presented in section 2.2. Non-  
360 significant values are plotted in white. The four methods correctly detect that there is no PAC  
361 involving amplitudes in the gamma band in population 2 (there is no significant spectral peak at

362 the gamma band, only white noise). However, according to ESC and Midx, there is significant  
363 PAC between the phases of the theta band in neuronal population 1 and the amplitudes of the  
364 gamma band in neuronal population 3, as well as PAC between the phases of the theta band in  
365 neuronal population 3 and the amplitudes of the gamma band in neuronal population 1. These  
366 results are expected because the signals in populations 1 and 3 are correlated, despite the fact that  
367 there is no connection between these populations. Regardless, cMI and cTE distinguished the  
368 correct effective interactions between the three populations.

369 There are cases where cMI fails to estimate the correct connections. For instance, Figure 3B  
370 shows the results of increasing the noise ( $\sigma_1 = \sigma_2 = \sigma_3 = 10$ ), which caused the measures ESC,  
371 Midx and cMI to yield similar results and estimate a significant effective connection between  
372 populations 1 and 3 that did not exist. Regardless, cTE was still able to distinguish the correct  
373 pattern of connections despite the increase in the noise level. When we further increased the  
374 noise ( $\sigma_1 = \sigma_2 = \sigma_3 = 30$ ), no significant results were obtained for any of the four measures  
375 (not shown in the figure).

### 376 **3.2. Generation of multiple PAC combinations**

377 In this section, we study the generation of PAC in the cortical column circuit depicted in Figure  
378 1. Since we are interested in the interaction between the rhythms produced by the nonlinear  
379 dynamics of the neuronal populations (not their correlation) and in the directionality of that  
380 interaction (from phases to amplitudes), we only compute cTE.

381 The values of the parameters used are shown in tables 2 and 3. White noise with a mean of zero  
382 and standard deviation  $\sigma = 1$  was added to the external inputs. Five seconds of data were  
383 simulated and the first two seconds were discarded to avoid transient behavior. Thus, subsequent  
384 steps were carried out with the remaining three seconds.

385 Figure 4 presents the temporal evolution of the average PSP in each neuronal population. Time  
386 series coloured in red correspond to excitatory populations (L2RS, L2IB, L4RS, L5RS, L5IB,  
387 L6RS), whereas inhibitory populations (L2LTS, L4LTS, L5LTS, L6LTS) are represented in  
388 green. As seen in the figure, the generated signals show the characteristic ‘waxing and waning’  
389 (i.e, amplitude modulation) observed in real EEG signals.

390 Figure 5 presents the normalized spectrum of the signals displayed in Figure 4. Excitatory  
391 populations are depicted in red and inhibitory populations are depicted in green. The six  
392 excitatory populations have their main spectrum peak in the alpha band, but they also present  
393 energy in the delta and theta bands. Slow inhibitory populations have the highest peak in the  
394 theta band, but also have energy in delta, alpha bands. Fast inhibitory populations were set to  
395 yield a peak in the gamma band, but due to the interaction with other populations they yield  
396 significant peaks in other frequencies as well, especially in the theta and alpha bands. This is  
397 evident when compared to the spectrum (in black) of the population when interactions between  
398 different populations are set to zero ( $\Gamma_{nm} = 0, n \neq m$ ). Peaks in black correspond to the natural  
399 frequency of oscillation for the populations L2RS (9.00 Hz), L2IB (10.67 Hz), L2LTS (7.00 Hz),  
400 L2FS (58.67 Hz), L4RS (9.33 Hz), L4LTS (7.00 Hz), L4FS (87.00 Hz), L5RS (8.67 Hz), L5IB  
401 (9.67 Hz), L5LTS (7.00 Hz), L5FS (63.99 Hz), L6RS (7.67 Hz), L6LTS (7.33 Hz), and L6FS  
402 (59.67 Hz).

403 To compare our simulated data with actual local field potential (LFP) data, we computed an  
404 approximation of the average LFP as the difference between the sum of excitatory and inhibitory  
405 activities in each layer.

406 Figure 6A displays the temporal dynamics of the LFP in each cortical layer and Figure 6B shows  
407 the corresponding spectral density. Thus, parameter values presented in tables 2 and 3 result in

408 low frequency oscillations (delta, theta and alpha) with highest power in layers 5 and 6 while  
409 gamma oscillations have its main power in layer 2/3. This is in agreement with recent findings  
410 suggesting that gamma activity is predominant in superficial layers while lower frequencies are  
411 predominant in deep layers (Maier, Adams et al. 2010, Buffalo, Fries et al. 2011).

412 To test the existence of PAC, we filtered each time series in Figure 4 into five frequency bands  
413 from delta to gamma (see section 2.2) and applied the Hilbert transform to obtain instantaneous  
414 phases and amplitudes for each frequency band and each neuronal population.

415 Ten different PAC combinations between a low-frequency phase and a higher-frequency  
416 amplitude were computed using the cTE measure: delta-theta, delta-alpha, delta-beta, delta-  
417 gamma, theta-alpha, theta-beta, theta-gamma, alpha-beta, alpha-gamma, and beta-gamma. Each  
418 PAC combination consisted of a matrix of 14x14 cTE values representing all possible  
419 interactions between the 14 neuronal populations. To test the significance of these values,  
420 surrogate data was computed, followed by a multiple comparison analysis as described in section  
421 2.2.

422 Results include nine out of the ten PAC combinations (Figure 7). The delta-beta PAC  
423 combination was not included since no significant values were obtained for the set of parameters  
424 used.

425 The strongest PAC value found was between the phase of the alpha band in L2IB and the  
426 amplitude of the gamma band in L4FS, which we will denote as  $L2IB \rightarrow L4FS$ . Other strong  
427 values found were theta-gamma ( $L6RS \rightarrow L4FS$ ,  $L4RS \rightarrow L4FS$ ,  $L2IB \rightarrow L4FS$ ,  $L6RS \rightarrow L5FS$ ),  
428 and alpha-gamma ( $L2IB \rightarrow L5FS$ ,  $L4FS \rightarrow L4FS$ ,  $L2FS \rightarrow L4FS$ ). Some of these values do not  
429 represent direct connections between the populations. For example, the strongest causal  
430 connection ( $L2IB \rightarrow L4FS$ ) does not correspond to an anatomical (direct) connection (see Figure

431 1). Thus, we emphasize that PAC matrices (Figure 7) represent effective connections, which can  
432 correspond or not correspond with anatomical connections. To make this clearer, anatomical  
433 connections in Figure 7 are represented with black dots.

### 434 **3.3. Parameter sensitivity analysis**

435 Some of the parameters presented in table 2 were taken from the neural mass literature (Jansen  
436 and Rit 1995, Wendling, Bellanger et al. 2000), and parameters with no equivalent in the  
437 literature were assigned physiologically reasonable values. Thus, it is necessary to explore how  
438 changes in these parameters can affect PAC values. In this section, for the sake of simplicity, we  
439 focus on three PAC combinations which involve the gamma rhythm and have been of great  
440 interest in the literature: delta-gamma, theta-gamma, and alpha-gamma.

#### 441 **3.3.1 Controlling the strength of PAC**

442 We selected nine different parameters and explored how their change affected the strength of the  
443 PAC phenomenon. For each parameter we considered 100 different values and thus performed  
444 100 different simulations. The parameters were: 1) a multiplying factor  $\eta = 0.3:0.3:3$   
445 controlling the global strength of the connectivity matrix ( $\Gamma_{nm} = \eta\Gamma_{nm}$ ), 2) the reciprocal of the  
446 time constant of RS populations ( $k_{RS} = 5:5:500s^{-1}$ ), 3) the reciprocal of the time constant of  
447 IB populations ( $k_{IB} = 5:5:500s^{-1}$ ), 4) the reciprocal of the time constant of LTS populations  
448 ( $k_{LTS} = 5:5:500s^{-1}$ ), 5) the reciprocal of the time constant of FS populations ( $k_{FS} =$   
449  $5:5:500s^{-1}$ ), 6) the external input to the L4RS population ( $p_5 = 10:10:1000$ ), 7) the external  
450 input to the L4FS population ( $p_7 = 10:10:1000$ ), 8) the gains of the six excitatory populations  
451 ( $G_E \equiv G_1 = G_2 = G_5 = G_8 = G_9 = G_{12} = 0.2:0.2:20$ ), and 9) the gains of the eight inhibitory  
452 populations ( $G_I \equiv G_3 = G_4 = G_6 = G_7 = G_{10} = G_{11} = G_{13} = G_{14} = 0.3:0.3:30$ ).

453 Then, for each PAC combination we obtained  $14 \times 14 \times 100 = 19600$  cTE values (although many of  
454 them are zero). We summarized that information by taking the strongest value found in each  
455 simulation, which results in a series of 100 values for each PAC combination. Figure 8A displays  
456 the mean and standard deviation of the 100-point series of the strongest PAC values for the three  
457 PAC combinations considered. In the figure, Delta-gamma PAC is depicted in orange, theta-  
458 gamma PAC in green, and alpha-gamma PAC in blue. Our results shows that for the three PAC  
459 combinations, the highest increase in cTE was obtained when changing the reciprocal time  
460 constants of LTS populations.

461 The exploration of the parameter space is important because PAC has been suggested to be the  
462 carrier mechanism for the interaction of local and global processes in the brain, and is thus  
463 directly related to the integration of distributed information in the brain (Canolty and Knight  
464 2010). Neuronal circuits can thus control the amount of information transmitted in the PAC  
465 phenomenon by changing the values of physiological parameters of specific populations.

### 466 **3.3.2 On the influence of the connectivity matrix $\Gamma_{nm}$ on PAC strength**

467 An important problem in neuroscience is the link between structural and functional brain  
468 networks (Honey, Sporns et al. 2009, Stam, van Straaten et al. 2015). In the context of this work,  
469 it is of interest to study the influence of the connectivity matrix  $\Gamma_{nm}$  on the generated PAC  
470 phenomenon.

471 For each of the 100 simulations we also computed the fraction ( $\xi$ ) of PAC connections that  
472 corresponded to anatomical connections. The obtained ratios for delta-gamma, theta-gamma, and  
473 alpha-gamma, were  $0.45 \pm 0.12$ ,  $0.36 \pm 0.04$ , and  $0.35 \pm 0.04$ , respectively. Figure 8B shows  
474 the plot of the ratios  $\xi$  versus the factor  $\eta$ , and the corresponding linear model fit. The linear

475 correlation values ( $r_l$ ) between  $\xi$  and  $\eta$  for delta-gamma, theta-gamma, and alpha-gamma PAC  
476 were 0.17, 0.08, and 0.15, respectively. The values were significant with  $\alpha = 0.05$ .

477 Figure 8C displays the series of 100 PAC values versus  $\eta$ . The solid line corresponds to the fit of  
478 a linear model. The linear correlation values between delta-gamma, theta-gamma, alpha-gamma  
479 and  $\eta$  were 0.16, 0.13, and 0.11, respectively. As expected, the linear correlation between the  
480 strength of the PAC phenomenon and the global strength of the connectivity matrix  $\Gamma_{nm}$  was  
481 weak, although significant (with  $\alpha = 0.05$ ). We then performed a nonlinear regression analysis  
482 (equation 10) with  $\eta$  as the regressor and computed the nonlinear correlation coefficient (section  
483 2.3). The nonlinear correlation values between delta-gamma, theta-gamma, alpha-gamma and  $\eta$   
484 were 0.44, 0.53, and 0.58, respectively, showing that there is a strong nonlinear relationship  
485 between the strength of PAC and effective connectivity between the populations involved. The  
486 values were significant as tested with the surrogate data approach (section 2.2).

487 We also counted all significant PAC connections obtained in the 100 simulations. The vectors of  
488 significant connections for delta-gamma, theta-gamma, and alpha-gamma PAC comprised 595,  
489 1464, and 1499, cTE values, respectively, for the PAC interactions that have a corresponding  
490 anatomical connection (direct interactions), and 740, 2656, and 2788 for the interactions without  
491 an anatomical equivalent (indirect interactions). The mean and standard deviations of these  
492 connections are presented in Figure 8D. Our results showed that for the three PAC combinations,  
493 the average strength of direct PAC interactions was slightly higher than indirect PAC  
494 interactions, but this difference was not statistically significant (as tested with a t-test,  $p < 0.05$ ).

495 Finally, we computed three local topological measures (section 2.4) for the network of 14  
496 coupled neuronal populations (Fig 1A):  $C_m$ ,  $E_m$ , and  $B_m$ . The edges of the network were the  
497 absolute values of the connections between the populations (Figure 1B). We found that on

498 average, indirect PAC interactions are made by populations with higher  $C_m$  (Figure 9A),  $E_m$   
499 (Figure 9B), and  $B_m$  (Figure 9C) than populations making direct connections, and populations  
500 not involved in PAC connections. Populations receiving indirect PAC connections had also on  
501 average higher topological measures than populations receiving direct interactions.

### 502 **3.4. Generation of other types of CFC**

503 The neural mass model presented in this paper can generate rich temporal dynamics. Studies of  
504 the dynamics generated by the Jansen and Rit model, which is the basis for our model, can be  
505 found elsewhere (Grimbert and Faugeras 2006, Faugeras, Veltz et al. 2009, Spiegler, Kiebel et  
506 al. 2010). In this paper we focused on PAC, but this is only one type of the general phenomenon  
507 of CFC which results from nonlinearities in brain dynamics. It is thus not unexpected to find  
508 other types of CFC in the signals generated by our model (for example, the temporal dynamics of  
509 L5RS in Figure 4 correspond to frequency modulation). In addition to PAC, other types of CFC  
510 such as AAC, PPC, and phase-frequency coupling (PFC) have been explored in the literature  
511 (Jirsa and Muller 2013, Hyafil, Giraud et al. 2015) and could all be calculated using equation (8)  
512 after replacing  $a_{nl}(t)$  and  $\varphi_{mk}(t)$  with the appropriate time series.

513 Recently, the analysis of resting state electrocorticography (ECoG) data revealed that the  
514 amplitude of gamma oscillations can drive the phase of alpha oscillations, i.e, APC (Jiang,  
515 Bahramisharif et al. 2015). Although this experimental result may seem surprising, it is consistent  
516 with theoretical results in the NMM literature. Specifically, starting with a network of Wilson and  
517 Cowan oscillators, equations for the instantaneous phases were obtained which depended on the  
518 instantaneous amplitudes of the oscillators in the network (Daffertshofer and van Wijk 2011).  
519 Thus, by setting different natural frequencies for the oscillators in the network, it is possible to  
520 obtain not only PAC but other types of CFC. To test the existence of APC we computed:



521 
$$cTE_{a_{nl} \rightarrow \varphi_{mk}} = \frac{1}{N} \sum_{\delta=1}^N cMI(a_{nl}, \varphi_{mk}^{\delta} | \tilde{M}) \quad (14)$$

522 where  $\varphi_{mk}^{\delta}$  is derived from the phase time series  $\varphi_{mk}$  at  $\delta$  steps into the future, i.e.  
523  $\varphi_{mk}^{\delta} = \varphi_{mk}(t + \delta)$ , and  $\tilde{M}$  is a matrix comprising all phases and amplitudes in all  
524 populations, except  $a_{nl}$ . Figure 10 shows the APC estimated from the simulated data shown in  
525 Figures 4 and 5, with the strongest values corresponding to the gamma-delta and gamma-theta  
526 APC combinations. Our simulation supports the existence of APC as recently proposed (Jiang,  
527 Bahramisharif et al. 2015).

### 528 **3.5. Mechanisms mediating indirect PAC interactions**

529 Due to the prevalence of indirect PAC interactions (Figure 7) it is necessary to investigate the  
530 mechanisms generating them. As mentioned in section 3.4, theoretical results have shown that  
531 amplitudes and phases are coupled even under weak coupling (Guckenheimer and Holmes 1997,  
532 Daffertshofer and van Wijk 2011). Thus, we expect that indirect information transfer from the  
533 phase of one population to the amplitude of the receiving population is mediated by direct  
534 interactions between phases and amplitudes via the connectivity matrix  $\Gamma_{nm}$ . It should be noted  
535 that although PAC typically refers to the interaction between the phase of a low frequency  
536 rhythm and the amplitude of a higher frequency rhythm, interactions between phases and  
537 amplitudes of the same frequency or between the phase of a high frequency and the amplitude of  
538 a low frequency are also possible.

539 In this section, to explore the mechanism mediating indirect PAC interactions, we focused on  
540 three populations labelled from 1 to 3 (Figures 11 and 12) and connected in such a way that there  
541 was not a direct connection between populations 1 and 3:  $1 \rightarrow 2 \rightarrow 3$ . Population 1 oscillated in the  
542 theta band and population 3 oscillated in the gamma band. Two different cases were considered  
543 for population 2. Case I (Figure 11): Population 2 oscillated with a frequency lower (delta band)

544 than population 1, and Case II (Figure 12): population 2 oscillated with a frequency higher (beta  
545 band) than population 1. Five different types of CFC were computed between the three  
546 populations (PAC, APC, PPC, AAC, and PFC) while varying the connectivity parameters  
547 between populations 1 and 2 ( $c_{12}$ ) and between populations 2 and 3 ( $c_{23}$ ). SFC was also  
548 considered and labelled in the same way as the CFC interactions. For example,  $PPC_{\theta_1\theta_2}$ , is the  
549 cTE from the phase of theta in population 1 to the phase of theta in population 2. To test the  
550 significance of these values, surrogate data was computed, followed by a multiple comparison  
551 analysis (section 2.2). As a control, we computed the cTE from populations 2 and 3 to population  
552 1 for all possible types of interactions (such as  $PPC_{\theta_2\theta_1}$ ), and confirmed they were not  
553 statistically significant.

554 There are several pathways that could transfer information from the phase of the theta oscillation  
555 in population 1 to the amplitude of the gamma oscillation in population 3 ( $PAC_{\theta_1\gamma_3}$ ). For  
556 example, a simple model could involve  $PPC_{\theta_1\theta_2}$  followed by PAC between the theta rhythm in  
557 population 2 and the gamma rhythm in population 3:  $PAC_{\theta_1\gamma_3} = PPC_{\theta_1\theta_2} + PAC_{\theta_2\gamma_3}$ . A more  
558 complicated one is:  $PAC_{\theta_1\gamma_3} = PPC_{\theta_1\delta_2} + PPC_{\delta_2\delta_3} + PAC_{\delta_3\gamma_3}$ .

559 To compare different models (Table 4), we fitted a linear regression to  $PAC_{\theta_1\gamma_3}$  and computed  
560 the coefficient of determination ( $R^2$ ) as a function of parameter  $c_{23}$ . For Case I we found that the  
561 three best models were Model 1 ( $PAC_{\theta_1\gamma_3} = PPC_{\theta_1\theta_2} + PAC_{\theta_2\gamma_3}$ ), Model 7 ( $PAC_{\theta_1\gamma_3} =$   
562  $PPC_{\theta_1\delta_2} + PPC_{\delta_2\delta_3} + PAC_{\delta_3\gamma_3}$ ), and Model 3 ( $PAC_{\theta_1\gamma_3} = PPC_{\theta_1\delta_2} + PAC_{\delta_2\gamma_3}$ ), with Model 1  
563 being the best model for low values of  $c_{23}$ , and Model 7 for the high values. On the other hand,  
564 we obtained the opposite behavior for Case II, i.e, Model 7 was the best model for low  $c_{23}$   
565 values, whereas Model 1 was better at explaining  $PAC_{\theta_1\gamma_3}$  for high  $c_{23}$  values. The correlation  
566 between the 16 CFC and SFC variables involved in the ten models is displayed in the last panel

567 for both cases (Figures 11 and 12). Although we found significant PFC combinations, models  
 568 involving these combinations were very weak predictors of  $PAC_{\theta_1\gamma_3}$  (with  $R^2 < 0.08$  in all cases)  
 569 and were thus not included in Table 3 and Figures 11 and 12.

570

571 **Table 4.** Indirect PAC modeled as a cascade of direct CFC and SFC in a three population  
 572 network. Two cases were considered: population 2 oscillates in the beta ( $\beta$ ) band (Case I), and  
 573 population 2 oscillates in the delta ( $\delta$ ) band (Case II). Populations 1 and 3 always oscillate in the  
 574 theta ( $\theta$ ) and gamma ( $\gamma$ ) bands, respectively.

575

| Model | Case I                                                                                              | Case II                                                                                             |
|-------|-----------------------------------------------------------------------------------------------------|-----------------------------------------------------------------------------------------------------|
| 1     | $PAC_{\theta_1\gamma_3} = PPC_{\theta_1\theta_2} + PAC_{\theta_2\gamma_3}$                          | $PAC_{\theta_1\gamma_3} = PPC_{\theta_1\theta_2} + PAC_{\theta_2\gamma_3}$                          |
| 2     | $PAC_{\theta_1\gamma_3} = PAC_{\theta_1\theta_2} + AAC_{\theta_2\gamma_3}$                          | $PAC_{\theta_1\gamma_3} = PAC_{\theta_1\theta_2} + AAC_{\theta_2\gamma_3}$                          |
| 3     | $PAC_{\theta_1\gamma_3} = PPC_{\theta_1\beta_2} + PAC_{\beta_2\gamma_3}$                            | $PAC_{\theta_1\gamma_3} = PPC_{\theta_1\delta_2} + PAC_{\delta_2\gamma_3}$                          |
| 4     | $PAC_{\theta_1\gamma_3} = PAC_{\theta_1\beta_2} + AAC_{\beta_2\gamma_3}$                            | $PAC_{\theta_1\gamma_3} = PAC_{\theta_1\delta_2} + AAC_{\delta_2\gamma_3}$                          |
| 5     | $PAC_{\theta_1\gamma_3} = PPC_{\theta_1\theta_2} + PPC_{\theta_2\theta_3} + PAC_{\theta_3\gamma_3}$ | $PAC_{\theta_1\gamma_3} = PPC_{\theta_1\theta_2} + PPC_{\theta_2\theta_3} + PAC_{\theta_3\gamma_3}$ |
| 6     | $PAC_{\theta_1\gamma_3} = PPC_{\theta_1\beta_2} + PPC_{\beta_2\theta_3} + PAC_{\theta_3\gamma_3}$   | $PAC_{\theta_1\gamma_3} = PPC_{\theta_1\delta_2} + PPC_{\delta_2\theta_3} + PAC_{\theta_3\gamma_3}$ |
| 7     | $PAC_{\theta_1\gamma_3} = PPC_{\theta_1\beta_2} + PPC_{\beta_2\beta_3} + PAC_{\beta_3\gamma_3}$     | $PAC_{\theta_1\gamma_3} = PPC_{\theta_1\delta_2} + APC_{\delta_2\delta_3} + PAC_{\delta_3\gamma_3}$ |
| 8     | $PAC_{\theta_1\gamma_3} = PAC_{\theta_1\theta_2} + APC_{\theta_2\theta_3} + PAC_{\theta_3\gamma_3}$ | $PAC_{\theta_1\gamma_3} = PAC_{\theta_1\theta_2} + APC_{\theta_2\theta_3} + PAC_{\theta_3\gamma_3}$ |
| 9     | $PAC_{\theta_1\gamma_3} = PAC_{\theta_1\beta_2} + APC_{\beta_2\theta_3} + PAC_{\theta_3\gamma_3}$   | $PAC_{\theta_1\gamma_3} = PAC_{\theta_1\delta_2} + APC_{\delta_2\theta_3} + PAC_{\theta_3\gamma_3}$ |
| 10    | $PAC_{\theta_1\gamma_3} = PAC_{\theta_1\beta_2} + APC_{\beta_2\beta_3} + PAC_{\beta_3\gamma_3}$     | $PAC_{\theta_1\gamma_3} = PAC_{\theta_1\delta_2} + APC_{\delta_2\delta_3} + PAC_{\delta_3\gamma_3}$ |

576

#### 577 4. Discussion

578 We have proposed a neural mass model that captures the phase-amplitude coupling between  
 579 layers in a cortical column. The model comprises fourteen interconnected neuronal populations  
 580 distributed across four cortical layers (L2/3, L4, L5 and L6). We omitted layer 1, because it does  
 581 not include somas (Binzegger, Douglas et al. 2004). Based on experimental reports on the  
 582 strength of the inputs to each layer (Binzegger, Douglas et al. 2004, Jellema, Brunia et al. 2004),

583 we only considered external inputs to the RS and FS populations in layer 4, thus neglecting  
584 possible external inputs to other layers.

585 According to our results, the parameters with the strongest influence on the strength of PAC  
586 were the time constants (especially the ones for LTS, FS, and IB populations). As expected, in  
587 order to generate PAC, nonlinearities in the model are essential. As was shown in Figure 2E,  
588 when the sigmoid function was substituted with a linear function, no modulation was obtained.  
589 Additionally, the strength of PAC was best modeled by a nonlinear regression of the connectivity  
590 values instead of a linear regression. Thus, our results show that the nonlinear interaction of  
591 neuronal populations (via the sigmoid function and the connectivity matrix) can produce PAC  
592 combinations with frequencies different from the natural frequencies of the oscillators involved.  
593 Our model of oscillators with natural frequencies in the theta, alpha and gamma bands was able  
594 to produce significant PAC involving delta and beta rhythms, including delta-alpha, delta-beta,  
595 delta-gamma, theta-beta, alpha-beta, and beta-gamma. Interestingly, some peaks in the beta band  
596 are harmonics of theta and alpha oscillations, such as the beta peak at 19 Hz in the spectrum of  
597 L4FS in Figure 5. Due to the interaction between the populations, there is a statistically  
598 significant PAC from the phase of beta in L4FS to the amplitude of gamma in L2FS, L4FS,  
599 L5FS and L6FS. Note that of these PAC interactions, only L4FS→L4FS corresponds to an  
600 anatomical connection (Figure 1B and table 3). If we take into account all PAC combinations in  
601 Figure 7, less than 40% of all significant PAC values ( $60/160=37.50\%$ ) corresponded to  
602 anatomical connections. This suggests that although effective connections are constrained by  
603 direct (anatomical) connections (Sotero, Bortel et al. 2010) additional factors are needed to fully  
604 explain the link between anatomical and effective connectivity. Interestingly, our numerical  
605 simulations showed that on average the strength of the PAC phenomenon mediated by direct and

606 indirect connections is approximately the same. However, local topological measures such as  
607 clustering coefficient, efficiency, and betweenness centrality were the highest for populations  
608 making indirect connections when compared to populations making direct PAC connections, to  
609 populations receiving PAC connections, and to populations not involved on the generation of  
610 PAC. This suggest that the topology of cortical circuits shapes the generation of the PAC  
611 phenomenon. This is another factor to consider when studying the origin of PAC during  
612 neurodegenerative disorders known to affect both local and global brain circuitry.

613 One limitation of the present approach is that model parameters are loosely constrained from  
614 existing neurophysiological data. Thus, although our model provides insight about the  
615 emergence of PAC in a complex network whose spectral and connectivity properties resemble  
616 that of a cortical column, specific conclusions should await to more knowledge of these data.

#### 617 **4.1. Comparison with previous models of PAC generation**

618 The first computational models of PAC generation were realistic models of the theta-gamma  
619 coupling in the hippocampus (Kopell, Boergers et al. 2010). These models considered networks  
620 of hundreds of interconnected neurons which were individually modeled by either a single  
621 compartment (White, Banks et al. 2000) or realistically represented by multiple compartments  
622 for the soma, axon, and dendrites (Tort, Rotstein et al. 2007). A practical disadvantage of this  
623 approach is that it needs high computational power, but more importantly, the use of such  
624 realistic models produces hundreds or thousands of variables and parameters, making it difficult  
625 to determine their influence on the generated average network characteristics. This is especially  
626 critical if we are interested in analyzing the link of PAC and mesoscopic phenomena like  
627 functional magnetic resonance signals (Wang, Saalman et al. 2012). The analysis of multiple  
628 PAC combinations as done in this paper would be even more difficult with realistic networks. By

629 comparison, our model of one cortical column comprised only 14 second-order (or 28 first-order)  
630 differential equations, which can be easily solved using any modern personal computer.  
631 Additionally, previous models of PAC generation, both the ones based on realistic networks  
632 (Kopell, Boergers et al. 2010) and the ones based on neural mass models (Onslow, Jones et al.  
633 2014) studied the phenomenon in a qualitative way, such that they did not actually compute a  
634 PAC measure but limited their analysis to the generation of temporal dynamics resembling PAC.  
635 This makes it difficult to compare their results with our quantitative approach based on  
636 information theory.

#### 637 **4.2. Indirect PAC connections can be predicted by a cascade of direct CFC and** 638 **interactions within the same frequency band**

639 As a unifying theory of EEG organization, it has been proposed that the EEG is hierarchically  
640 organized such that the delta phase modulates the theta amplitude, and the theta phase modulates  
641 the gamma amplitude (Lakatos, Shah et al. 2005). It was also proposed that this oscillatory  
642 hierarchy controls baseline excitability and that the hierarchical organization of ambient  
643 oscillatory activity allows the auditory cortex to structure its temporal activity pattern to optimize  
644 the processing of rhythmic inputs. Recent findings suggest a somewhat different hierarchy of  
645 oscillatory activity with regard to these frequency bands (Sotero, Bortel et al. 2015). Sotero et al.  
646 did not observe PAC between the delta and theta bands in rat area S1FL: PAC was statistically  
647 significant between the phases of the delta and theta bands and the amplitudes of the beta and  
648 gamma bands, but not between the phase of the delta band and the amplitude of the theta band.  
649 Their data support specific PAC interactions, but not a clear hierarchical PAC structure. The  
650 differences between Lakatos et al.'s findings and Sotero et al.'s findings are consistent with their  
651 proposal that the hierarchical structure found in the auditory cortex may support processing of

652 rhythmic auditory stimuli, which are less common in natural somatosensory stimuli to the  
653 forepaw. Both studies were restricted to PAC and did not explore whether the oscillatory  
654 hierarchy might involve other types of CFC. While historically PAC and PPC have been the  
655 subject of most experimental and modeling studies, other types of CFC are attracting increasing  
656 interest (Jirsa and Muller 2013, Hyafil, Giraud et al. 2015, Jiang, Bahramisharif et al. 2015). Our  
657 results show that indirect PAC is better understood if analyzed along with direct PAC and other  
658 types of direct CFC and SFC connections. Our simulations do not suggest a specific oscillatory  
659 hierarchy like the one proposed by Lakatos et al., but multiple contributing cascades of CFC and  
660 SFC. Future analysis of experimental data will need to determine the functional importance of  
661 these different possible pathways.

#### 662 **4.3. cTE as a unified approach to estimate CFC**

663 In this work, we used the average cTE, computed using the conditional mutual information  
664 (Palus, Komarek et al. 2001, Palus and Stefanovska 2003) to measure the influence of the phase  
665 of a low frequency rhythm on the amplitude of a higher frequency rhythm, and used it as an index  
666 of PAC. A known limitation of the cTE approach is that it requires long time series (Hlavackova-  
667 Schindler, Palus et al. 2007). For this reason, we used time series comprising of 30,000 time  
668 instants. Recent studies have shown that cTE is biased as its values depend on the  
669 autodependency coefficient in a dynamical system (Runge, Heitzig et al. 2012). Conditional TE  
670 was chosen over pairwise mutual information (MacKay 2003) or the pairwise information flow  
671 (Liang 2014) because pairwise analysis cannot distinguish between connectivity configurations  
672 such as  $[X \rightarrow Y, X \rightarrow Z, Z \rightarrow Y]$  and  $[X \rightarrow Z, Z \rightarrow Y]$  (Ding 2006).

673 An advantage of measures based on information theory is that they are model-free. This is in  
674 contrast to other measures like Granger causality, which are based on autoregressive models

675 (Seth, Barrett et al. 2015). Furthermore, Granger causality should not be applied to band-passed  
676 signals because the filtering process produces a large increase in the empirical model order,  
677 which often results in spurious results (Barnett and Seth 2011). Another advantage of the cTE  
678 measure is that it can be used to estimate any type of CFC, not just PAC. Thus, it provides a  
679 unified measure to study the CFC phenomenon.

680 cTE has often been given a causal interpretation, however a more recent point of view (Lizier  
681 and Prokopenko 2010) suggests that cTE should be interpreted as predictive information transfer,  
682 i.e. the amount of information that a source variable adds to the next state of the destination  
683 variable. Ultimately, interventions are required to detect causal interactions (Pearl 2000). This  
684 formalism is used in a causal measure called information flow (Ay and Polani 2008), which is  
685 also based on the cMI .

686

687

688

## 689 **Acknowledgements**

690 The author thanks Lazaro Sanchez for his comments on a previous version of the manuscript,  
691 and Erica A. Baines for English editing. This work was partially supported by grant RGPIN-  
692 2015-05966 from Natural Sciences and Engineering Research Council of Canada.

693

## 694 **References**

695 Albert, R. and A. L. Barabasi (2002). "Statistical mechanics of complex networks." Reviews of Modern  
696 Physics **74**(1): 47-97.



- 697 Allene, C., A. Cattani, J. B. Ackman, P. Bonifazi, L. Aniksztejn, Y. Ben-Ari and R. Cossart (2008).  
698 "Sequential generation of two distinct synapse-driven network patterns in developing neocortex." J  
699 Neurosci **28**(48): 12851-12863.
- 700 Albert, R. and A. L. Barabasi (2002). "Statistical mechanics of complex networks." Reviews of Modern  
701 Physics **74**(1): 47-97.
- 702 Allene, C., A. Cattani, J. B. Ackman, P. Bonifazi, L. Aniksztejn, Y. Ben-Ari and R. Cossart (2008).  
703 "Sequential generation of two distinct synapse-driven network patterns in developing neocortex." J  
704 Neurosci **28**(48): 12851-12863.
- 705 Ay, N. and D. Polani (2008). "Information flows in causal networks." Advances in Complex Systems **11**(1):  
706 17-41.
- 707 Barnett, L. and A. K. Seth (2011). "Behaviour of Granger causality under filtering: theoretical invariance  
708 and practical application." J Neurosci Methods **201**(2): 404-419.
- 709 Binzegger, T., R. J. Douglas and K. A. C. Martin (2004). "A quantitative map of the circuit of cat primary  
710 visual cortex." Journal of Neuroscience **24**(39): 8441-8453.
- 711 Bragin, A., G. Jando, Z. Nadasdy, J. Hetke, K. Wise and G. Buzsaki (1995). "Gamma (40-100-Hz) Oscillation  
712 in the Hippocampus of the Behaving Rat." Journal of Neuroscience **15**(1): 47-60.
- 713 Brown, G., A. Pocock, M. J. Zhao and M. Lujan (2012). "Conditional Likelihood Maximisation: A Unifying  
714 Framework for Information Theoretic Feature Selection." Journal of Machine Learning Research **13**: 27-  
715 66.
- 716 Buffalo, E. A., P. Fries, R. Landman, T. J. Buschman and R. Desimone (2011). "Laminar differences in  
717 gamma and alpha coherence in the ventral stream." Proc Natl Acad Sci U S A **108**(27): 11262-11267.
- 718 Buzsáki, G. (2006). Rhythms of the brain. Oxford ; New York, Oxford University Press.
- 719 Canolty, R. T., C. F. Cadieu, K. Koepsell, R. T. Knight and J. M. Carmena (2012). "Multivariate phase-  
720 amplitude cross-frequency coupling in neurophysiological signals." IEEE Trans Biomed Eng **59**(1): 8-11.

721 Canolty, R. T., E. Edwards, S. S. Dalal, M. Soltani, S. S. Nagarajan, H. E. Kirsch, M. S. Berger, N. M. Barbaro  
722 and R. T. Knight (2006). "High gamma power is phase-locked to theta oscillations in human neocortex."  
723 Science **313**(5793): 1626-1628.

724 Canolty, R. T. and R. T. Knight (2010). "The functional role of cross-frequency coupling." Trends Cogn Sci  
725 **14**(11): 506-515.

726 Carbonell, F., J. C. Jimenez, R. J. Biscay and H. De La Cruz (2005). "The local linearization method for  
727 numerical integration of random differential equations." Bit Numerical Mathematics **45**(1): 1-14.

728 Cohen, M. X., C. E. Elger and J. Fell (2009). "Oscillatory activity and phase-amplitude coupling in the  
729 human medial frontal cortex during decision making." J Cogn Neurosci **21**(2): 390-402.

730 Daffertshofer, A. and B. C. van Wijk (2011). "On the Influence of Amplitude on the Connectivity between  
731 Phases." Front Neuroinform **5**: 6.

732 David, O. and K. J. Friston (2003). "A neural mass model for MEG/EEG: coupling and neuronal dynamics."  
733 Neuroimage **20**(3): 1743-1755.

734 de Hemptinne, C., E. S. Ryapolova-Webb, E. L. Air, P. A. Garcia, K. J. Miller, J. G. Ojemann, J. L. Ostrem, N.  
735 B. Galifianakis and P. A. Starr (2013). "Exaggerated phase-amplitude coupling in the primary motor  
736 cortex in Parkinson disease." Proc Natl Acad Sci U S A **110**(12): 4780-4785.

737 Demiralp, T., Z. Bayraktaroglu, D. Lenz, S. Junge, N. A. Busch, B. Maess, M. Ergen and C. S. Herrmann  
738 (2007). "Gamma amplitudes are coupled EEG during visual to theta phase in human perception."  
739 International Journal of Psychophysiology **64**(1): 24-30.

740 Ding, M., Chen, Y., Bressler, S.L (2006). Granger causality: Basic theory and application to neuroscience.  
741 Handbook of Time Series Analysis. W. Schelter. S., N., & Timmer, J. , Wiley, Wienheim.

742 Dürschmid, S., T. Zaehle, K. Kopitzki, J. Voges, F. C. Schmitt, H. J. Heinze, R. T. Knight and H. Hinrichs  
743 (2013). "Phase-amplitude cross-frequency coupling in the human nucleus accumbens tracks action  
744 monitoring during cognitive control." Front Hum Neurosci **7**: 635.

- 745 Fagiolo, G. (2007). "Clustering in complex directed networks." Physical Review E **76**(2).
- 746 Faugeras, O., R. Veltz and F. Grimbert (2009). "Persistent neural states: stationary localized activity  
747 patterns in nonlinear continuous n-population, q-dimensional neural networks." Neural Comput **21**(1):  
748 147-187.
- 749 Florin, E. and S. Baillet (2015). "The brain's resting-state activity is shaped by synchronized cross-  
750 frequency coupling of neural oscillations." Neuroimage **111**: 26-35.
- 751 Grimbert, F. and O. Faugeras (2006). "Bifurcation analysis of Jansen's neural mass model." Neural  
752 Comput **18**(12): 3052-3068.
- 753 Gross, J., N. Hoogenboom, G. Thut, P. Schyns, S. Panzeri, P. Belin and S. Garrod (2013). "Speech Rhythms  
754 and Multiplexed Oscillatory Sensory Coding in the Human Brain." Plos Biology **11**(12).
- 755 Guckenheimer, J. and P. Holmes (1997). Nonlinear oscillations, dynamical systems, and bifurcations of  
756 vector fields. New York, Springer.
- 757 Hlavackova-Schindler, K., M. Palus, M. Vejmelka and J. Bhattacharya (2007). "Causality detection based  
758 on information-theoretic approaches in time series analysis." Physics Reports-Review Section of Physics  
759 Letters **441**(1): 1-46.
- 760 Honey, C. J., R. Kotter, M. Breakspear and O. Sporns (2007). "Network structure of cerebral cortex  
761 shapes functional connectivity on multiple time scales." Proc Natl Acad Sci U S A **104**(24): 10240-10245.
- 762 Honey, C. J., O. Sporns, L. Cammoun, X. Gigandet, J. P. Thiran, R. Meuli and P. Hagmann (2009).  
763 "Predicting human resting-state functional connectivity from structural connectivity." Proc Natl Acad Sci  
764 U S A **106**(6): 2035-2040.
- 765 Hyafil, A., A. L. Giraud, L. Fontolan and B. Gutkin (2015). "Neural Cross-Frequency Coupling: Connecting  
766 Architectures, Mechanisms, and Functions." Trends Neurosci **38**(11): 725-740.
- 767 Ito, J., P. Maldonado and S. Grun (2013). "Cross-frequency interaction of the eye-movement related LFP  
768 signals in V1 of freely viewing monkeys." Front Syst Neurosci **7**: 1.

769 Jansen, B. H. and V. G. Rit (1995). "Electroencephalogram and Visual-Evoked Potential Generation in a  
770 Mathematical-Model of Coupled Cortical Columns." Biological Cybernetics **73**(4): 357-366.

771 Jellema, T., C. H. M. Brunia and W. J. Wadman (2004). "Sequential activation of microcircuits underlying  
772 somatosensory-evoked potentials in rat neocortex." Neuroscience **129**(2): 283-295.

773 Jiang, H., A. Bahramisharif, M. A. van Gerven and O. Jensen (2015). "Measuring directionality between  
774 neuronal oscillations of different frequencies." Neuroimage **118**: 359-367.

775 Jirsa, V. and V. Muller (2013). "Cross-frequency coupling in real and virtual brain networks." Frontiers in  
776 Computational Neuroscience **7**.

777 Kopell, N., C. Boegers, D. Pervouchine, P. Malerba and A. B. Tort (2010). Gamma and Theta Rhythms in  
778 Biophysical Models of Hippocampal Circuits. Hippocampal Microcircuits: A COMPUTATIONAL MODELER'S  
779 RESOURCE BOOK, V. Cutsuridis, B. Graham, S. Cobb and I. Vida, SPRINGER, 233 SPRING STREET, NEW  
780 YORK, NY 10013, UNITED STATES.

781 Lakatos, P., A. S. Shah, K. H. Knuth, I. Ulbert, G. Karmos and C. E. Schroeder (2005). "An oscillatory  
782 hierarchy controlling neuronal excitability and stimulus processing in the auditory cortex." Journal of  
783 Neurophysiology **94**(3): 1904-1911.

784 Latora, V. and M. Marchiori (2001). "Efficient behavior of small-world networks." Physical Review Letters  
785 **87**(19).

786 Lee, J. and J. Jeong (2013). "Correlation of risk-taking propensity with cross-frequency phase-amplitude  
787 coupling in the resting EEG." Clin Neurophysiol **124**(11): 2172-2180.

788 Liang, X. S. (2014). "Unraveling the cause-effect relation between time series." Physical Review E **90**(5).

789 Lizier, J. T., J. Heinzle, A. Horstmann, J. D. Haynes and M. Prokopenko (2011). "Multivariate information-  
790 theoretic measures reveal directed information structure and task relevant changes in fMRI  
791 connectivity." J Comput Neurosci **30**(1): 85-107.

- 792 Lizier, J. T. and M. Prokopenko (2010). "Differentiating information transfer and causal effect." European  
793 Physical Journal B **73**(4): 605-615.
- 794 MacKay, D. J. C. (2003). Information theory, inference, and learning algorithms. Cambridge, UK ; New  
795 York, Cambridge University Press.
- 796 Maier, A., G. K. Adams, C. Aura and D. A. Leopold (2010). "Distinct superficial and deep laminar domains  
797 of activity in the visual cortex during rest and stimulation." Front Syst Neurosci **4**.
- 798 McGinn, R. J. and T. A. Valiante (2014). "Phase-amplitude coupling and interlaminar synchrony are  
799 correlated in human neocortex." J Neurosci **34**(48): 15923-15930.
- 800 Nakatani, C., A. Raffone and C. van Leeuwen (2014). "Efficiency of Conscious Access Improves with  
801 Coupling of Slow and Fast Neural Oscillations." Journal of Cognitive Neuroscience **26**(5): 1168-1179.
- 802 Newman, M. E. J., A.-L. s. Barabási and D. J. Watts (2006). The structure and dynamics of networks.  
803 Princeton, Princeton University Press.
- 804 Neymotin, S. A., K. M. Jacobs, A. A. Fenton and W. W. Lytton (2011). "Synaptic information transfer in  
805 computer models of neocortical columns." J Comput Neurosci **30**(1): 69-84.
- 806 Onslow, A. C., M. W. Jones and R. Bogacz (2014). "A canonical circuit for generating phase-amplitude  
807 coupling." PLoS One **9**(8): e102591.
- 808 Osipova, D., D. Hermes and O. Jensen (2008). "Gamma Power Is Phase-Locked to Posterior Alpha  
809 Activity." Plos One **3**(12).
- 810 Palus, M., V. Komarek, Z. Hrncir and K. Sterbova (2001). "Synchronization as adjustment of information  
811 rates: detection from bivariate time series." Phys Rev E Stat Nonlin Soft Matter Phys **63**(4 Pt 2): 046211.
- 812 Palus, M. and A. Stefanovska (2003). "Direction of coupling from phases of interacting oscillators: an  
813 information-theoretic approach." Phys Rev E Stat Nonlin Soft Matter Phys **67**(5 Pt 2): 055201.
- 814 Pearl, J. (2000). Causality : models, reasoning, and inference. Cambridge, U.K. ; New York, Cambridge  
815 University Press.

816 Penny, W. D., E. Duzel, K. J. Miller and J. G. Ojemann (2008). "Testing for nested oscillation." Journal of  
817 Neuroscience Methods **174**(1): 50-61.

818 Pereda, E., R. Q. Quiroga and J. Bhattacharya (2005). "Nonlinear multivariate analysis of  
819 neurophysiological signals." Prog Neurobiol **77**(1-2): 1-37.

820 Rubinov, M. and O. Sporns (2010). "Complex network measures of brain connectivity: Uses and  
821 interpretations." Neuroimage **52**(3): 1059-1069.

822 Runge, J., J. Heitzig, N. Marwan and J. Kurths (2012). "Quantifying causal coupling strength: A lag-specific  
823 measure for multivariate time series related to transfer entropy." Physical Review E **86**(6).

824 Seth, A. K., A. B. Barrett and L. Barnett (2015). "Granger causality analysis in neuroscience and  
825 neuroimaging." J Neurosci **35**(8): 3293-3297.

826 Sotero, R. C. (2015). "Modeling the Generation of Phase-Amplitude Coupling in Cortical Circuits: From  
827 Detailed Networks to Neural Mass Models." Biomed Res Int **2015**: 915606.

828 Sotero, R. C., A. Bortel, R. Martinez-Cancino, S. Neupane, P. O'Connor, F. Carbonell and A. Shmuel  
829 (2010). "Anatomically-Constrained Effective Connectivity among Layers in a Cortical Column Modeled  
830 and Estimated from Local Field Potentials." Journal of Integrative Neuroscience **9**(4): 355-379.

831 Sotero, R. C., A. B. Bortel, S. Naaman, V. M. Mocanu, P. Kropf, M. Villeneuve and A. Shmuel (2015).  
832 "Laminar distribution of phase-amplitude coupling of spontaneous current sources and sinks." Frontiers  
833 in Neuroscience **9**.

834 Sotero, R. C. and N. J. Trujillo-Barreto (2008). "Biophysical model for integrating neuronal activity, EEG,  
835 fMRI and metabolism." Neuroimage **39**(1): 290-309.

836 Sotero, R. C., N. J. Trujillo-Barreto, Y. Iturria-Medina, F. Carbonell and J. C. Jimenez (2007). "Realistically  
837 coupled neural mass models can generate EEG rhythms." Neural Computation **19**(2): 478-512.

838 Spaak, E., M. Bonnefond, A. Maier, D. A. Leopold and O. Jensen (2012). "Layer-Specific Entrainment of  
839 Gamma-Band Neural Activity by the Alpha Rhythm in Monkey Visual Cortex." Current Biology **22**(24):  
840 2313-2318.

841 Spiegler, A., S. J. Kiebel, F. M. Atay and T. R. Knosche (2010). "Bifurcation analysis of neural mass models:  
842 Impact of extrinsic inputs and dendritic time constants." Neuroimage **52**(3): 1041-1058.

843 Stam, C. J., E. C. van Straaten, E. Van Dellen, P. Tewarie, G. Gong, A. Hillebrand, J. Meier and P. Van  
844 Mieghem (2015). "The relation between structural and functional connectivity patterns in complex brain  
845 networks." Int J Psychophysiol.

846 Storey, J. D. and R. Tibshirani (2003). "Statistical significance for genomewide studies." Proc Natl Acad  
847 Sci U S A **100**(16): 9440-9445.

848 Szczepanski, S. M., N. E. Crone, R. A. Kuperman, K. I. Auguste, J. Parvizi and R. T. Knight (2014). "Dynamic  
849 changes in phase-amplitude coupling facilitate spatial attention control in fronto-parietal cortex." PLoS  
850 Biol **12**(8): e1001936.

851 Tattini, L., S. Olmi and A. Torcini (2012). "Coherent periodic activity in excitatory Erdos-Renyi neural  
852 networks: The role of network connectivity." Chaos **22**(2).

853 Tort, A. B. L., R. Komorowski, H. Eichenbaum and N. Kopell (2010). "Measuring Phase-Amplitude  
854 Coupling Between Neuronal Oscillations of Different Frequencies." Journal of Neurophysiology **104**(2):  
855 1195-1210.

856 Tort, A. B. L., H. G. Rotstein, T. Dugladze, T. Gloveli and N. J. Kopell (2007). "On the formation of gamma-  
857 coherent cell assemblies by oriens lacunosum-moleculare interneurons in the hippocampus."  
858 Proceedings of the National Academy of Sciences of the United States of America **104**(33): 13490-13495.

859 Ursino, M., F. Cona and M. Zavaglia (2010). "The generation of rhythms within a cortical region: analysis  
860 of a neural mass model." Neuroimage **52**(3): 1080-1094.

861 Valdes-Sosa, P. A., J. M. Sanchez-Bornot, R. C. Sotero, Y. Iturria-Medina, Y. Aleman-Gomez, J. Bosch-  
862 Bayard, F. Carbonell and T. Ozaki (2009). "Model Driven EEG/fMRI Fusion of Brain Oscillations." Human  
863 Brain Mapping **30**(9): 2701-2721.

864 Voytek, B., R. T. Canolty, A. Shestyuk, N. E. Crone, J. Parvizi and R. T. Knight (2010). "Shifts in gamma  
865 phase-amplitude coupling frequency from theta to alpha over posterior cortex during visual tasks."  
866 Front Hum Neurosci **4**: 191.

867 Wang, J., D. Li, X. L. Li, F. Y. Liu, G. G. Xing, J. Cai and Y. Wan (2011). "Phase-amplitude coupling between  
868 theta and gamma oscillations during nociception in rat electroencephalography." Neuroscience Letters  
869 **499**(2): 84-87.

870 Wang, L., Y. B. Saalman, M. A. Pinsk, M. J. Arcaro and S. Kastner (2012). "Electrophysiological Low-  
871 Frequency Coherence and Cross-Frequency Coupling Contribute to BOLD Connectivity." Neuron **76**(5):  
872 1010-1020.

873 Wang, X. J. and G. Buzsaki (1996). "Gamma oscillation by synaptic inhibition in a hippocampal  
874 interneuronal network model." Journal of Neuroscience **16**(20): 6402-6413.

875 Watts, D. J. and S. H. Strogatz (1998). "Collective dynamics of 'small-world' networks." Nature  
876 **393**(6684): 440-442.

877 Wendling, F., J. J. Bellanger, F. Bartolomei and P. Chauvel (2000). "Relevance of nonlinear lumped-  
878 parameter models in the analysis of depth-EEG epileptic signals." Biological Cybernetics **83**(4): 367-378.

879 White, J. A., M. I. Banks, R. A. Pearce and N. J. Kopell (2000). "Networks of interneurons with fast and  
880 slow gamma-aminobutyric acid type A (GABA(A)) kinetics provide substrate for mixed gamma-theta  
881 rhythm." Proceedings of the National Academy of Sciences of the United States of America **97**(14): 8128-  
882 8133.

883 Wilson, H. R. and J. D. Cowan (1972). "Excitatory and Inhibitory Interactions in Localized Populations of  
884 Model Neurons." Biophysical Journal **12**(1): 1-&.



- 885 Zavaglia, M., L. Astolfi, F. Babiloni and M. Ursino (2006). "A neural mass model for the simulation of  
886 cortical activity estimated from high resolution EEG during cognitive or motor tasks." J Neurosci  
887 Methods **157**(2): 317-329.
- 888 Zavaglia, M., F. Cona and M. Ursino (2010). "A neural mass model to simulate different rhythms in a  
889 cortical region." Comput Intell Neurosci: 456140.
- 890 Barnett, L. and A. K. Seth (2011). "Behaviour of Granger causality under filtering: theoretical invariance  
891 and practical application." J Neurosci Methods **201**(2): 404-419.
- 892 Binzegger, T., R. J. Douglas and K. A. C. Martin (2004). "A quantitative map of the circuit of cat primary  
893 visual cortex." Journal of Neuroscience **24**(39): 8441-8453.
- 894 Bragin, A., G. Jando, Z. Nadasdy, J. Hetke, K. Wise and G. Buzsaki (1995). "Gamma (40-100-Hz) Oscillation  
895 in the Hippocampus of the Behaving Rat." Journal of Neuroscience **15**(1): 47-60.
- 896 Brown, G., A. Pocock, M. J. Zhao and M. Lujan (2012). "Conditional Likelihood Maximisation: A Unifying  
897 Framework for Information Theoretic Feature Selection." Journal of Machine Learning Research **13**: 27-  
898 66.
- 899 Buffalo, E. A., P. Fries, R. Landman, T. J. Buschman and R. Desimone (2011). "Laminar differences in  
900 gamma and alpha coherence in the ventral stream." Proc Natl Acad Sci U S A **108**(27): 11262-11267.
- 901 Buzsáki, G. (2006). Rhythms of the brain. Oxford ; New York, Oxford University Press.
- 902 Canolty, R. T., C. F. Cadieu, K. Koepsell, R. T. Knight and J. M. Carmena (2012). "Multivariate phase-  
903 amplitude cross-frequency coupling in neurophysiological signals." IEEE Trans Biomed Eng **59**(1): 8-11.
- 904 Canolty, R. T., E. Edwards, S. S. Dalal, M. Soltani, S. S. Nagarajan, H. E. Kirsch, M. S. Berger, N. M. Barbaro  
905 and R. T. Knight (2006). "High gamma power is phase-locked to theta oscillations in human neocortex."  
906 Science **313**(5793): 1626-1628.
- 907 Canolty, R. T. and R. T. Knight (2010). "The functional role of cross-frequency coupling." Trends Cogn Sci  
908 **14**(11): 506-515.

909 Carbonell, F., J. C. Jimenez, R. J. Biscay and H. De La Cruz (2005). "The local linearization method for  
910 numerical integration of random differential equations." Bit Numerical Mathematics **45**(1): 1-14.

911 Cohen, M. X., C. E. Elger and J. Fell (2009). "Oscillatory activity and phase-amplitude coupling in the  
912 human medial frontal cortex during decision making." J Cogn Neurosci **21**(2): 390-402.

913 Daffertshofer, A. and B. C. van Wijk (2011). "On the Influence of Amplitude on the Connectivity between  
914 Phases." Front Neuroinform **5**: 6.

915 David, O. and K. J. Friston (2003). "A neural mass model for MEG/EEG: coupling and neuronal dynamics."  
916 Neuroimage **20**(3): 1743-1755.

917 de Hemptinne, C., E. S. Ryapolova-Webb, E. L. Air, P. A. Garcia, K. J. Miller, J. G. Ojemann, J. L. Ostrem, N.  
918 B. Galifianakis and P. A. Starr (2013). "Exaggerated phase-amplitude coupling in the primary motor  
919 cortex in Parkinson disease." Proc Natl Acad Sci U S A **110**(12): 4780-4785.

920 Demiralp, T., Z. Bayraktaroglu, D. Lenz, S. Junge, N. A. Busch, B. Maess, M. Ergen and C. S. Herrmann  
921 (2007). "Gamma amplitudes are coupled EEG during visual to theta phase in human perception."  
922 International Journal of Psychophysiology **64**(1): 24-30.

923 Ding, M., Chen, Y., Bressler, S.L (2006). Granger causality: Basic theory and application to neuroscience.  
924 Handbook of Time Series Analysis. W. Schelter. S., N., & Timmer, J. , Wiley, Wienheim.

925 Durschmid, S., T. Zaehle, K. Kopitzki, J. Voges, F. C. Schmitt, H. J. Heinze, R. T. Knight and H. Hinrichs  
926 (2013). "Phase-amplitude cross-frequency coupling in the human nucleus accumbens tracks action  
927 monitoring during cognitive control." Front Hum Neurosci **7**: 635.

928 Fagiolo, G. (2007). "Clustering in complex directed networks." Physical Review E **76**(2).

929 Faugeras, O., R. Veltz and F. Grimbort (2009). "Persistent neural states: stationary localized activity  
930 patterns in nonlinear continuous n-population, q-dimensional neural networks." Neural Comput **21**(1):  
931 147-187.

- 932 Florin, E. and S. Baillet (2015). "The brain's resting-state activity is shaped by synchronized cross-  
933 frequency coupling of neural oscillations." Neuroimage **111**: 26-35.
- 934 Grimbert, F. and O. Faugeras (2006). "Bifurcation analysis of Jansen's neural mass model." Neural  
935 Comput **18**(12): 3052-3068.
- 936 Gross, J., N. Hoogenboom, G. Thut, P. Schyns, S. Panzeri, P. Belin and S. Garrod (2013). "Speech Rhythms  
937 and Multiplexed Oscillatory Sensory Coding in the Human Brain." Plos Biology **11**(12).
- 938 Guckenheimer, J. and P. Holmes (1997). Nonlinear oscillations, dynamical systems, and bifurcations of  
939 vector fields. New York, Springer.
- 940 Hlavackova-Schindler, K., M. Palus, M. Vejmelka and J. Bhattacharya (2007). "Causality detection based  
941 on information-theoretic approaches in time series analysis." Physics Reports-Review Section of Physics  
942 Letters **441**(1): 1-46.
- 943 Honey, C. J., R. Kotter, M. Breakspear and O. Sporns (2007). "Network structure of cerebral cortex  
944 shapes functional connectivity on multiple time scales." Proc Natl Acad Sci U S A **104**(24): 10240-10245.
- 945 Honey, C. J., O. Sporns, L. Cammoun, X. Gigandet, J. P. Thiran, R. Meuli and P. Hagmann (2009).  
946 "Predicting human resting-state functional connectivity from structural connectivity." Proc Natl Acad Sci  
947 U S A **106**(6): 2035-2040.
- 948 Hyafil, A., A. L. Giraud, L. Fontolan and B. Gutkin (2015). "Neural Cross-Frequency Coupling: Connecting  
949 Architectures, Mechanisms, and Functions." Trends Neurosci **38**(11): 725-740.
- 950 Ito, J., P. Maldonado and S. Grun (2013). "Cross-frequency interaction of the eye-movement related LFP  
951 signals in V1 of freely viewing monkeys." Front Syst Neurosci **7**: 1.
- 952 Jansen, B. H. and V. G. Rit (1995). "Electroencephalogram and Visual-Evoked Potential Generation in a  
953 Mathematical-Model of Coupled Cortical Columns." Biological Cybernetics **73**(4): 357-366.
- 954 Jellema, T., C. H. M. Brunia and W. J. Wadman (2004). "Sequential activation of microcircuits underlying  
955 somatosensory-evoked potentials in rat neocortex." Neuroscience **129**(2): 283-295.

956 Jiang, H., A. Bahramisharif, M. A. van Gerven and O. Jensen (2015). "Measuring directionality between  
957 neuronal oscillations of different frequencies." Neuroimage **118**: 359-367.

958 Jirsa, V. and V. Muller (2013). "Cross-frequency coupling in real and virtual brain networks." Frontiers in  
959 Computational Neuroscience **7**.

960 Kopell, N., C. Boegers, D. Pervouchine, P. Malerba and A. B. Tort (2010). Gamma and Theta Rhythms in  
961 Biophysical Models of Hippocampal Circuits. Hippocampal Microcircuits:A COMPUTATIONAL MODELER'S  
962 RESOURCE BOOK. V. Cutsuridis, B. Graham, S. Cobb and I. Vida, SPRINGER, 233 SPRING STREET, NEW  
963 YORK, NY 10013, UNITED STATES.

964 Lakatos, P., A. S. Shah, K. H. Knuth, I. Ulbert, G. Karmos and C. E. Schroeder (2005). "An oscillatory  
965 hierarchy controlling neuronal excitability and stimulus processing in the auditory cortex." Journal of  
966 Neurophysiology **94**(3): 1904-1911.

967 Latora, V. and M. Marchiori (2001). "Efficient behavior of small-world networks." Physical Review Letters  
968 **87**(19).

969 Lee, J. and J. Jeong (2013). "Correlation of risk-taking propensity with cross-frequency phase-amplitude  
970 coupling in the resting EEG." Clin Neurophysiol **124**(11): 2172-2180.

971 Liang, X. S. (2014). "Unraveling the cause-effect relation between time series." Physical Review E **90**(5).

972 Lizier, J. T. and M. Prokopenko (2010). "Differentiating information transfer and causal effect." European  
973 Physical Journal B **73**(4): 605-615.

974 MacKay, D. J. C. (2003). Information theory, inference, and learning algorithms. Cambridge, UK ; New  
975 York, Cambridge University Press.

976 Maier, A., G. K. Adams, C. Aura and D. A. Leopold (2010). "Distinct superficial and deep laminar domains  
977 of activity in the visual cortex during rest and stimulation." Front Syst Neurosci **4**.

978 McGinn, R. J. and T. A. Valiante (2014). "Phase-amplitude coupling and interlaminar synchrony are  
979 correlated in human neocortex." J Neurosci **34**(48): 15923-15930.

- 980 Nakatani, C., A. Raffone and C. van Leeuwen (2014). "Efficiency of Conscious Access Improves with  
981 Coupling of Slow and Fast Neural Oscillations." Journal of Cognitive Neuroscience **26**(5): 1168-1179.
- 982 Newman, M. E. J., A.-L. s. Barabási and D. J. Watts (2006). The structure and dynamics of networks.  
983 Princeton, Princeton University Press.
- 984 Neymotin, S. A., K. M. Jacobs, A. A. Fenton and W. W. Lytton (2011). "Synaptic information transfer in  
985 computer models of neocortical columns." J Comput Neurosci **30**(1): 69-84.
- 986 Onslow, A. C., M. W. Jones and R. Bogacz (2014). "A canonical circuit for generating phase-amplitude  
987 coupling." PLoS One **9**(8): e102591.
- 988 Osipova, D., D. Hermes and O. Jensen (2008). "Gamma Power Is Phase-Locked to Posterior Alpha  
989 Activity." Plos One **3**(12).
- 990 Palus, M., V. Komarek, Z. Hrnčir and K. Sterbova (2001). "Synchronization as adjustment of information  
991 rates: detection from bivariate time series." Phys Rev E Stat Nonlin Soft Matter Phys **63**(4 Pt 2): 046211.
- 992 Palus, M. and A. Stefanovska (2003). "Direction of coupling from phases of interacting oscillators: an  
993 information-theoretic approach." Phys Rev E Stat Nonlin Soft Matter Phys **67**(5 Pt 2): 055201.
- 994 Pearl, J. (2000). Causality : models, reasoning, and inference. Cambridge, U.K. ; New York, Cambridge  
995 University Press.
- 996 Penny, W. D., E. Duzel, K. J. Miller and J. G. Ojemann (2008). "Testing for nested oscillation." Journal of  
997 Neuroscience Methods **174**(1): 50-61.
- 998 Pereda, E., R. Q. Quiroga and J. Bhattacharya (2005). "Nonlinear multivariate analysis of  
999 neurophysiological signals." Prog Neurobiol **77**(1-2): 1-37.
- 1000 Rubinov, M. and O. Sporns (2010). "Complex network measures of brain connectivity: Uses and  
1001 interpretations." Neuroimage **52**(3): 1059-1069.
- 1002 Runge, J., J. Heitzig, N. Marwan and J. Kurths (2012). "Quantifying causal coupling strength: A lag-specific  
1003 measure for multivariate time series related to transfer entropy." Physical Review E **86**(6).

- 1004 Schreiber, T. (2000). "Measuring information transfer." Physical Review Letters **85**(2): 461-464.
- 1005 Seth, A. K., A. B. Barrett and L. Barnett (2015). "Granger causality analysis in neuroscience and  
1006 neuroimaging." J Neurosci **35**(8): 3293-3297.
- 1007 Sotero, R. C. (2015). "Modeling the Generation of Phase-Amplitude Coupling in Cortical Circuits: From  
1008 Detailed Networks to Neural Mass Models." Biomed Res Int **2015**: 915606.
- 1009 Sotero, R. C., A. Bortel, R. Martinez-Cancino, S. Neupane, P. O'Connor, F. Carbonell and A. Shmuel  
1010 (2010). "Anatomically-Constrained Effective Connectivity among Layers in a Cortical Column Modeled  
1011 and Estimated from Local Field Potentials." Journal of Integrative Neuroscience **9**(4): 355-379.
- 1012 Sotero, R. C., A. B. Bortel, S. Naaman, V. M. Mocanu, P. Kropf, M. Villeneuve and A. Shmuel (2015).  
1013 "Laminar distribution of phase-amplitude coupling of spontaneous current sources and sinks." Frontiers  
1014 in Neuroscience **9**.
- 1015 Sotero, R. C. and N. J. Trujillo-Barreto (2008). "Biophysical model for integrating neuronal activity, EEG,  
1016 fMRI and metabolism." Neuroimage **39**(1): 290-309.
- 1017 Sotero, R. C., N. J. Trujillo-Barreto, Y. Iturria-Medina, F. Carbonell and J. C. Jimenez (2007). "Realistically  
1018 coupled neural mass models can generate EEG rhythms." Neural Computation **19**(2): 478-512.
- 1019 Spaak, E., M. Bonnefond, A. Maier, D. A. Leopold and O. Jensen (2012). "Layer-Specific Entrainment of  
1020 Gamma-Band Neural Activity by the Alpha Rhythm in Monkey Visual Cortex." Current Biology **22**(24):  
1021 2313-2318.
- 1022 Spiegler, A., S. J. Kiebel, F. M. Atay and T. R. Knosche (2010). "Bifurcation analysis of neural mass models:  
1023 Impact of extrinsic inputs and dendritic time constants." Neuroimage **52**(3): 1041-1058.
- 1024 Stam, C. J., E. C. van Straaten, E. Van Dellen, P. Tewarie, G. Gong, A. Hillebrand, J. Meier and P. Van  
1025 Mieghem (2015). "The relation between structural and functional connectivity patterns in complex brain  
1026 networks." Int J Psychophysiol.

- 1027 Storey, J. D. and R. Tibshirani (2003). "Statistical significance for genomewide studies." Proc Natl Acad  
1028 Sci U S A **100**(16): 9440-9445.
- 1029 Strimmer, K. (2008). "A unified approach to false discovery rate estimation." BMC Bioinformatics **9**: 303.
- 1030 Szczepanski, S. M., N. E. Crone, R. A. Kuperman, K. I. Auguste, J. Parvizi and R. T. Knight (2014). "Dynamic  
1031 changes in phase-amplitude coupling facilitate spatial attention control in fronto-parietal cortex." PLoS  
1032 Biol **12**(8): e1001936.
- 1033 Tattini, L., S. Olmi and A. Torcini (2012). "Coherent periodic activity in excitatory Erdos-Renyi neural  
1034 networks: The role of network connectivity." Chaos **22**(2).
- 1035 Tort, A. B. L., R. Komorowski, H. Eichenbaum and N. Kopell (2010). "Measuring Phase-Amplitude  
1036 Coupling Between Neuronal Oscillations of Different Frequencies." Journal of Neurophysiology **104**(2):  
1037 1195-1210.
- 1038 Tort, A. B. L., H. G. Rotstein, T. Dugladze, T. Gloveli and N. J. Kopell (2007). "On the formation of gamma-  
1039 coherent cell assemblies by oriens lacunosum-moleculare interneurons in the hippocampus."  
1040 Proceedings of the National Academy of Sciences of the United States of America **104**(33): 13490-13495.
- 1041 Ursino, M., F. Cona and M. Zavaglia (2010). "The generation of rhythms within a cortical region: analysis  
1042 of a neural mass model." Neuroimage **52**(3): 1080-1094.
- 1043 Valdes-Sosa, P. A., J. M. Sanchez-Bornot, R. C. Sotero, Y. Iturria-Medina, Y. Aleman-Gomez, J. Bosch-  
1044 Bayard, F. Carbonell and T. Ozaki (2009). "Model Driven EEG/fMRI Fusion of Brain Oscillations." Human  
1045 Brain Mapping **30**(9): 2701-2721.
- 1046 Voytek, B., R. T. Canolty, A. Shestyuk, N. E. Crone, J. Parvizi and R. T. Knight (2010). "Shifts in gamma  
1047 phase-amplitude coupling frequency from theta to alpha over posterior cortex during visual tasks."  
1048 Front Hum Neurosci **4**: 191.

- 1049 Wang, J., D. Li, X. L. Li, F. Y. Liu, G. G. Xing, J. Cai and Y. Wan (2011). "Phase-amplitude coupling between  
1050 theta and gamma oscillations during nociception in rat electroencephalography." Neuroscience Letters  
1051 **499**(2): 84-87.
- 1052 Wang, L., Y. B. Saalman, M. A. Pinsk, M. J. Arcaro and S. Kastner (2012). "Electrophysiological Low-  
1053 Frequency Coherence and Cross-Frequency Coupling Contribute to BOLD Connectivity." Neuron **76**(5):  
1054 1010-1020.
- 1055 Wang, X. J. and G. Buzsaki (1996). "Gamma oscillation by synaptic inhibition in a hippocampal  
1056 interneuronal network model." Journal of Neuroscience **16**(20): 6402-6413.
- 1057 Watts, D. J. and S. H. Strogatz (1998). "Collective dynamics of 'small-world' networks." Nature  
1058 **393**(6684): 440-442.
- 1059 Wendling, F., J. J. Bellanger, F. Bartolomei and P. Chauvel (2000). "Relevance of nonlinear lumped-  
1060 parameter models in the analysis of depth-EEG epileptic signals." Biological Cybernetics **83**(4): 367-378.
- 1061 White, J. A., M. I. Banks, R. A. Pearce and N. J. Kopell (2000). "Networks of interneurons with fast and  
1062 slow gamma-aminobutyric acid type A (GABA(A)) kinetics provide substrate for mixed gamma-theta  
1063 rhythm." Proceedings of the National Academy of Sciences of the United States of America **97**(14): 8128-  
1064 8133.
- 1065 Wilson, H. R. and J. D. Cowan (1972). "Excitatory and Inhibitory Interactions in Localized Populations of  
1066 Model Neurons." Biophysical Journal **12**(1): 1-&.
- 1067 Zavaglia, M., L. Astolfi, F. Babiloni and M. Ursino (2006). "A neural mass model for the simulation of  
1068 cortical activity estimated from high resolution EEG during cognitive or motor tasks." J Neurosci  
1069 Methods **157**(2): 317-329.

1070

1071

1072 **Figure Legends**



1073

1074 **Figure 1.** Proposed neural mass model of the cortical column. A) Layer distribution of the four  
1075 neuronal types. The excitatory populations are the intrinsically bursting (IB), and the regulatory  
1076 spiking (RS). The inhibitory populations are low-threshold spiking (LTS) and fast spiking (FS).  
1077 B) Connectivity matrix values used for coupling the 14 populations modeled. Negative values  
1078 correspond to inhibitory connections.

1079

1080 **Figure 2.** Three population toy model. A) The model comprises three neuronal populations  
1081 labelled as '1', '2', and '3', coloured in blue, red and green, respectively. This color legend is  
1082 used across all panels in the figure. B) Connectivity matrix. C) Temporal dynamics of the three  
1083 neuronal populations. D) Spectral density. E) Spectral density when substituting the sigmoid  
1084 function with the linear function  $S(x) = x$ .

1085

1086 **Figure 3.** Causality vs correlation measures of PAC. A) Midx, ESC, cMI and TE. B) Midx, ESC,  
1087 cMI and cTE when the noise is increased ( $\sigma_1 = \sigma_2 = \sigma_3 = 10$ ).

1088

1089 **Figure 4.** Simulated temporal evolution of the postsynaptic potentials for all populations for one  
1090 realization of the model. Excitatory populations are depicted in red and inhibitory ones in green.

1091

1092 **Figure 5.** Normalized spectral density (nSD) of the postsynaptic potentials shown in Figure 3  
1093 obtained by subtracting the mean of the spectral density vector and dividing by the standard  
1094 deviation. Excitatory populations are depicted in red and inhibitory ones in green. nSD coloured  
1095 in black show the results when the connections between populations are set to zero.

1096

1097 **Figure 6.** Laminar distribution of average LFP. A) Temporal dynamics in layers 2/3 (L2/3),

1098 4(L4), 5(L5) and 6(L6). B) Spectral density (SD).

1099

1100 **Figure 7.** Phase-amplitude coupling (PAC) corresponding to the simulation presented in Figure

1101 4. Non-significant values were set to zero and are depicted in white. Black dots indicate existing

1102 anatomical connections (see figure 1).

1103

1104 **Figure 8.** Exploring the parameter space for three different PAC combinations. A) Average cTE

1105 values for delta-gamma (orange), theta-gamma (green), and alpha-gamma (blue) PAC when

1106 considered 100 different values for nine different parameters: 1) a multiplying factor  $\eta =$

1107 0.3:0.3:3 controlling the global strength of the connectivity matrix ( $\Gamma_{nm} = \eta\Gamma_{nm}$ ), 2) the

1108 reciprocal of the time constant of RS populations ( $k_{RS} = 5:5:500s^{-1}$ ), 3) the reciprocal of the

1109 time constant of IB populations ( $k_{IB} = 5:5:500s^{-1}$ ), 4) the reciprocal of the time constant of

1110 LTS populations ( $k_{LTS} = 5:5:500s^{-1}$ ), 5) the reciprocal of the time constant of FS populations

1111 ( $k_{FS} = 5:5:500s^{-1}$ ), 6) the external input to the L4RS population ( $p_5 = 10:10:1000$ ), 7) the

1112 external input to the L4FS population ( $p_7 = 10:10:1000$ ), 8) the gains of the six excitatory

1113 populations ( $G_E \equiv G_1 = G_2 = G_5 = G_8 = G_9 = G_{12} = 0.2:0.2:20$ ), and 9) the gains of the eight

1114 inhibitory populations ( $G_I \equiv G_3 = G_4 = G_6 = G_7 = G_{10} = G_{11} = G_{13} = G_{14} = 0.3:0.3:30$ ). B)

1115 Plot of the fraction ( $\xi$ ) of PAC connections that corresponded to anatomical connections versus

1116  $\eta$ . C) Plot of cTE versus  $\eta$ . D) Average cTE values for direct and indirect PAC connections.

1117 Labels 'd', and 'i' correspond to direct and indirect PAC connections

1118

1119 **Figure 9.** The link between local topological measures and PAC. A) local clustering coefficient  
1120 ( $C_m$ ), B) local efficiency ( $E_m$ ), C) local betweenness centrality ( $B_m$ ). In all panels, labels ‘d’,  
1121 and ‘i’ correspond to direct and indirect PAC connections, respectively. Populations can send  
1122 and/or receive PAC interactions, or they can be not involved in the generation of PAC.

1123

1124 **Figure 10.** Amplitude-phase coupling (APC) corresponding to the simulation presented in  
1125 Figures 4 and 5. Non-significant values were set to zero and are depicted in white. Black dots  
1126 indicate existing anatomical connections (see figure 1).

1127

1128

1129 **Figure 11.** Mechanisms mediating indirect PAC connections (Case I). A) Three population toy  
1130 model comprising three neuronal populations labelled as ‘1’, ‘2’, and ‘3’, oscillating in the theta  
1131 ( $\theta$ ), delta ( $\delta$ ), and gamma ( $\gamma$ ) bands. B) PAC involving the phase of theta in population 1 and  
1132 the amplitude of gamma in population 3 ( $PAC_{\theta_1\gamma_3}$ ) obtained when varying the connectivity  
1133 parameters between populations 1 and 2 ( $c_{12} = 30:4:1000$ ) and between populations 2 and 3  
1134 ( $c_{23} = 30:4:1000$ ). Panels C to R, displays the 16 predictors used in the ten models explored  
1135 (table 4). S) Coefficient of determination ( $R^2$ ) for the ten models explored (table 4). T) Correlation  
1136 coefficient between the 16 predictors.

1137 **Figure 12.** Mechanisms mediating indirect PAC connections (Case II). A) Three population toy  
1138 model comprising three neuronal populations labelled as ‘1’, ‘2’, and ‘3’, oscillating in the theta  
1139 ( $\theta$ ), beta ( $\beta$ ), and gamma ( $\gamma$ ) bands. B) PAC involving the phase of theta in population 1 and  
1140 the amplitude of gamma in population 3 ( $PAC_{\theta_1\gamma_3}$ ) obtained when varying the connectivity  
1141 parameters between populations 1 and 2 ( $c_{12} = 30:4:1000$ ) and between populations 2 and 3

1142 ( $c_{23} = 30:4:1000$ ). Panels C to R, display the 16 predictors used in the ten models explored  
1143 (table 4). S) Coefficient of determination ( $R^2$ ) for the ten models explored (table 4). T)  
1144 Correlation coefficient between the 16 predictors.

1145



**A**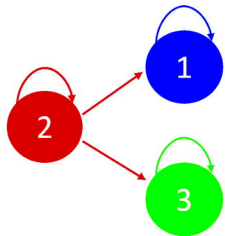**B**

Connectivity Matrix

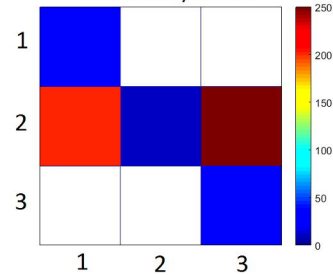**C**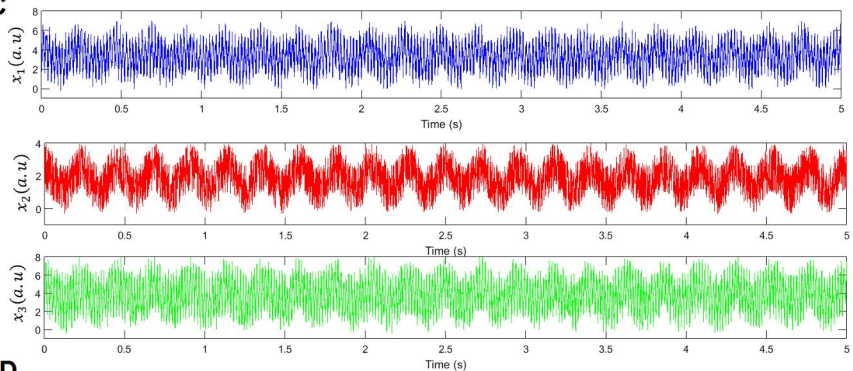**D**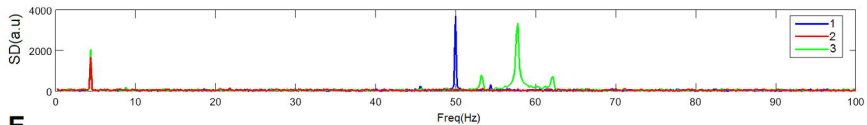**E**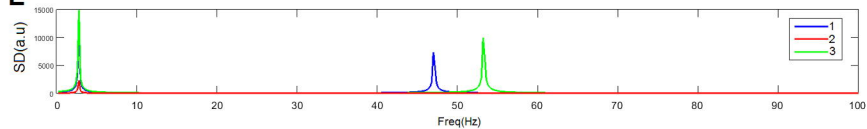

**A**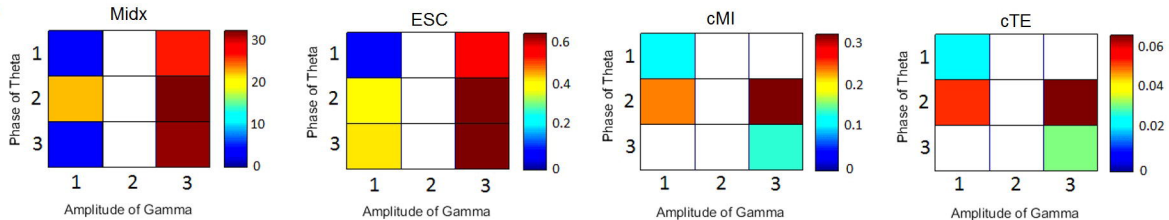**B**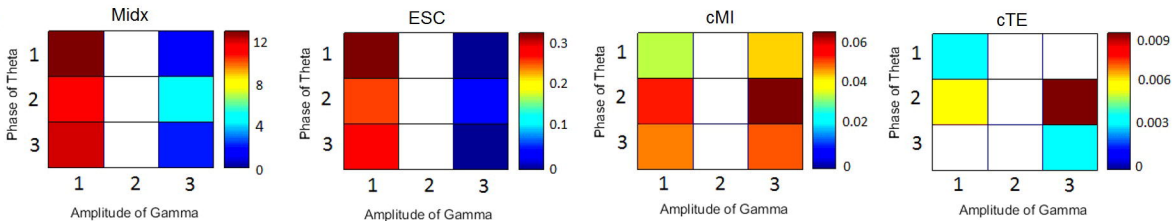

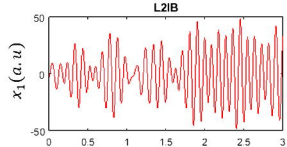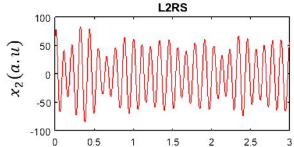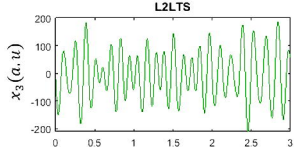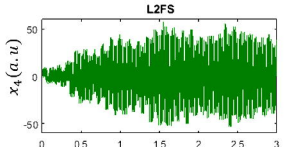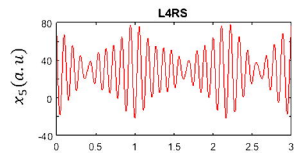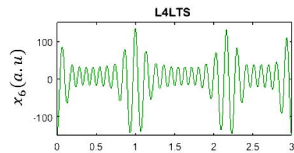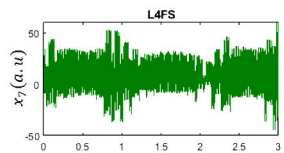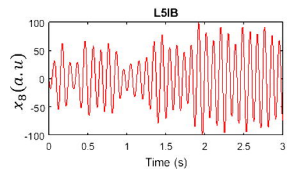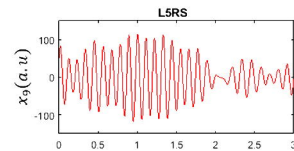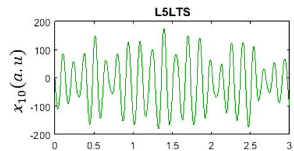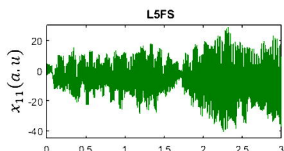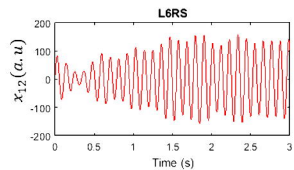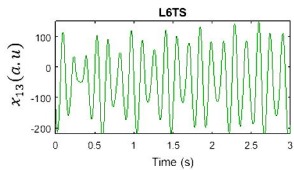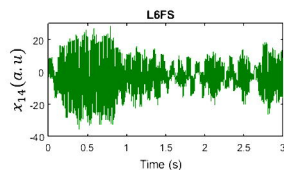



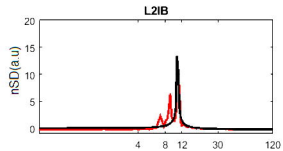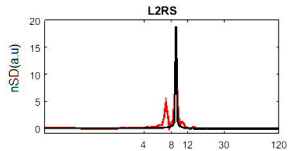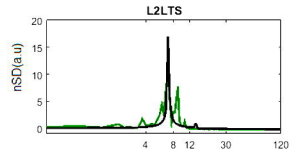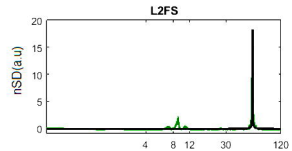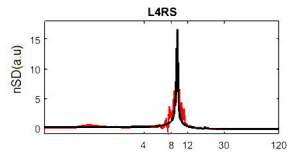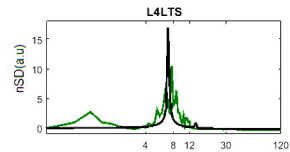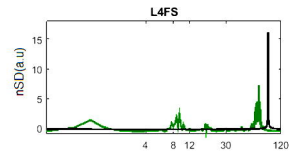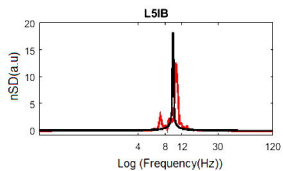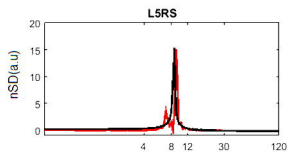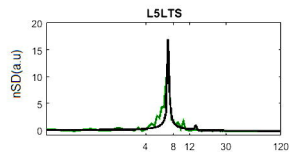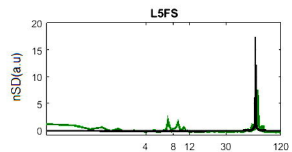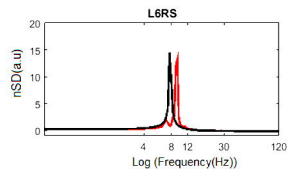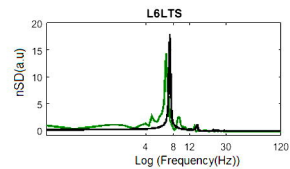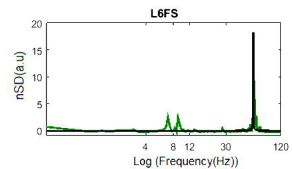

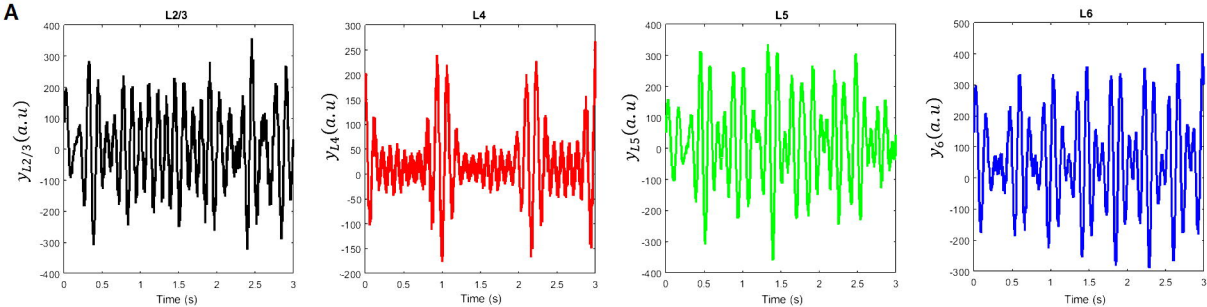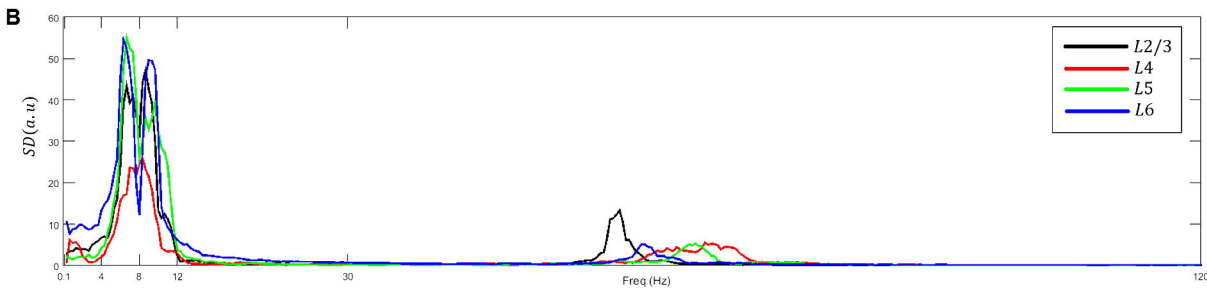

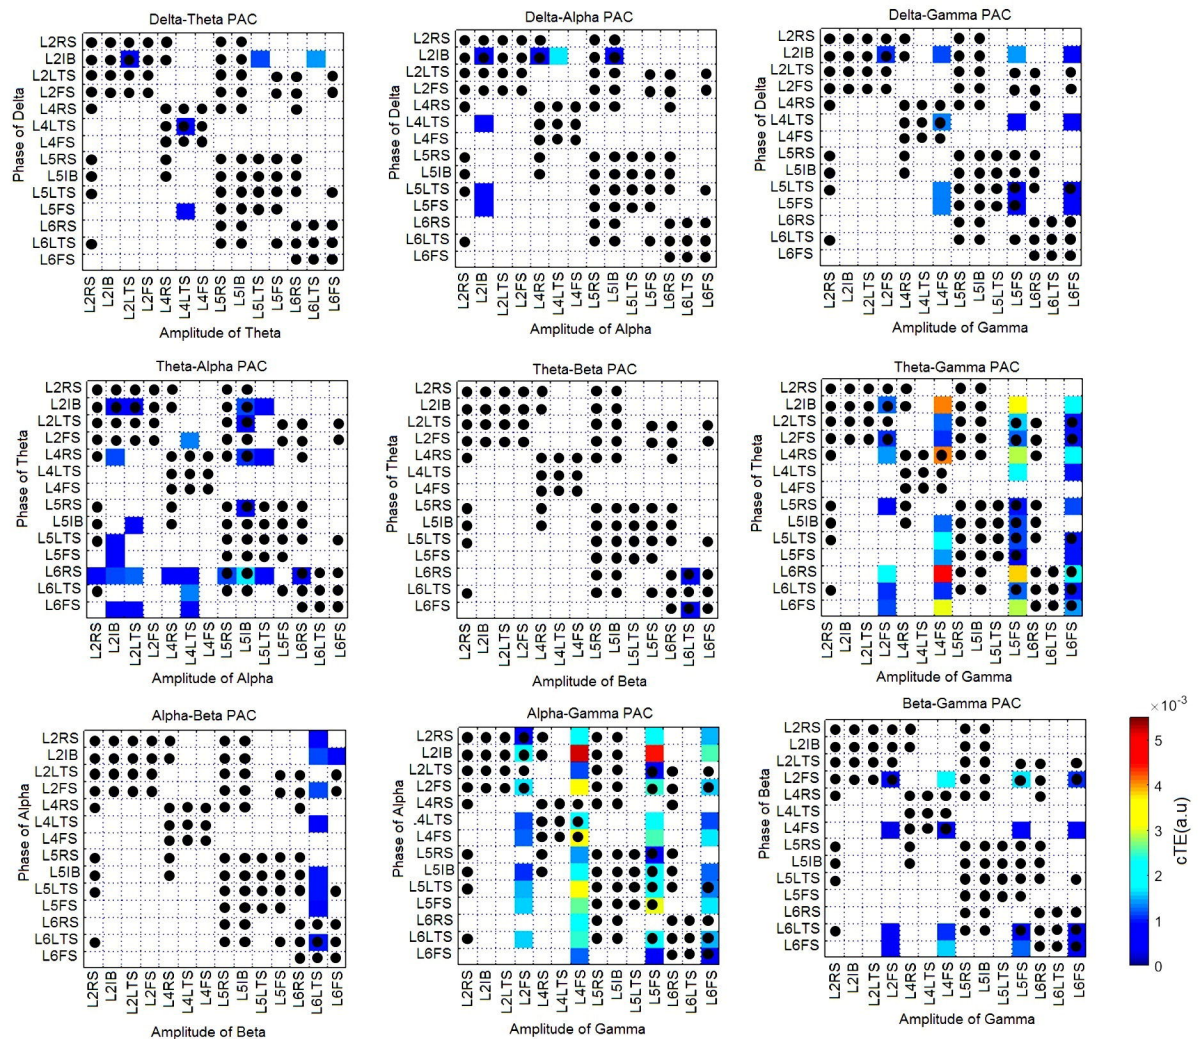

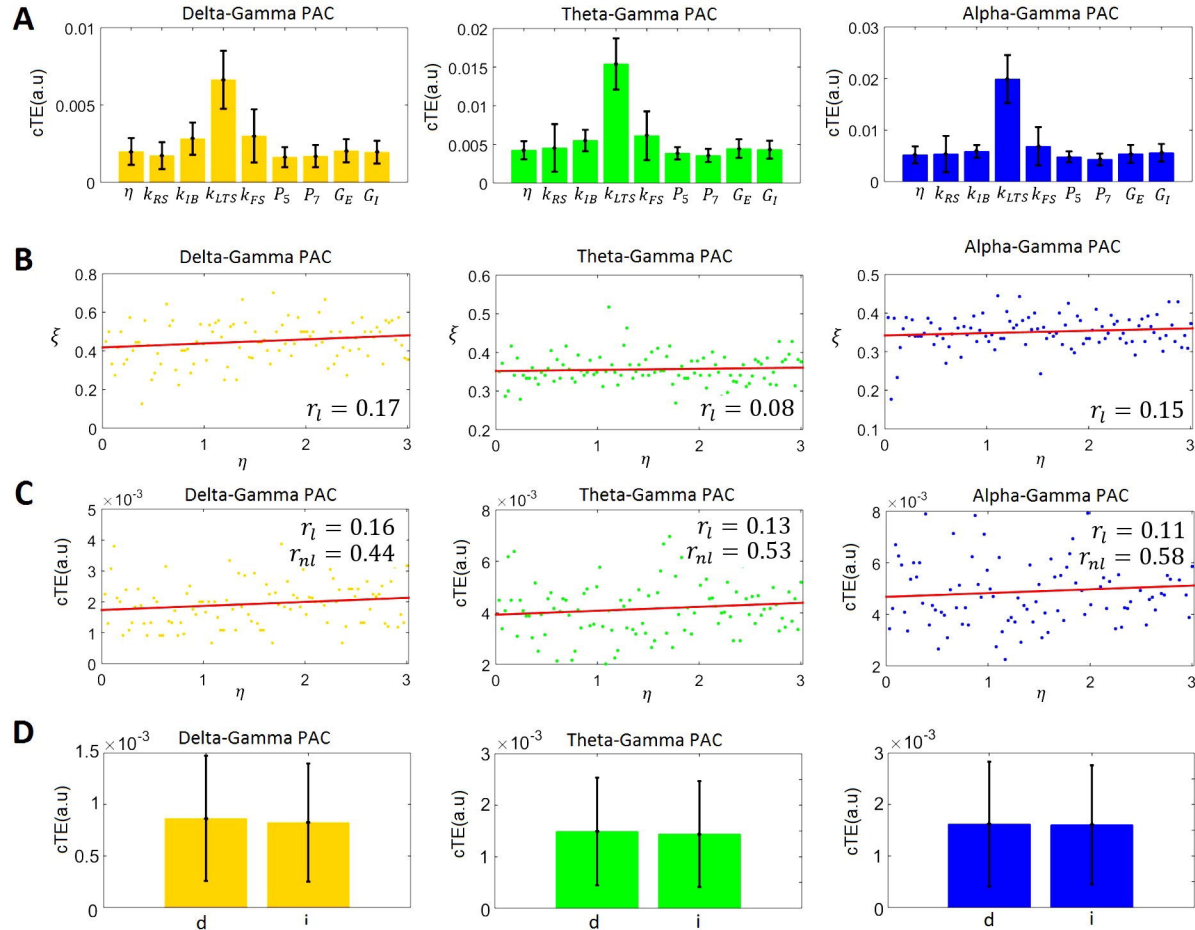

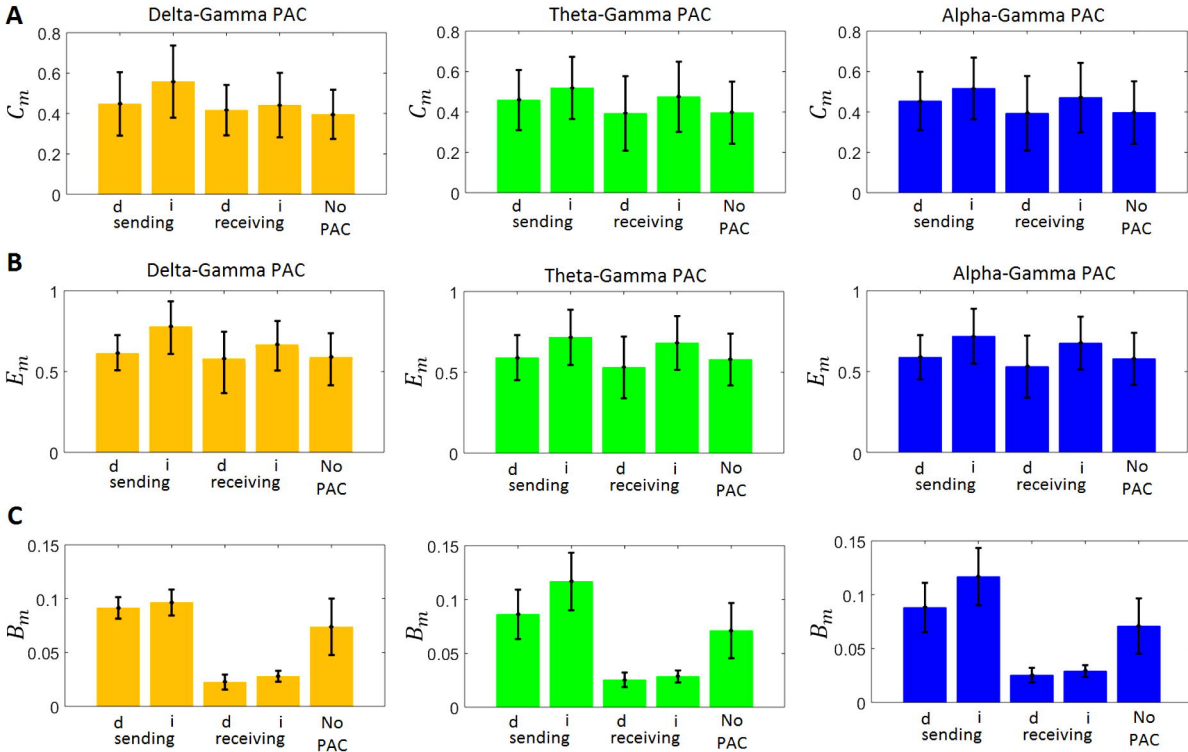



Alpha-Delta APC

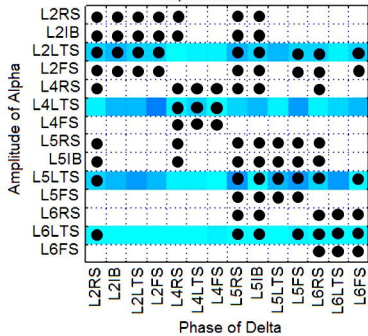

Beta-Delta APC

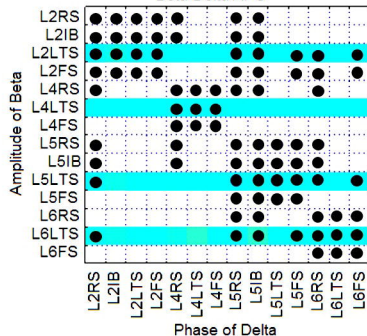

Gamma-Delta APC

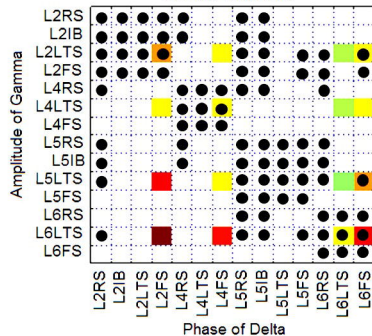

Alpha-Theta APC

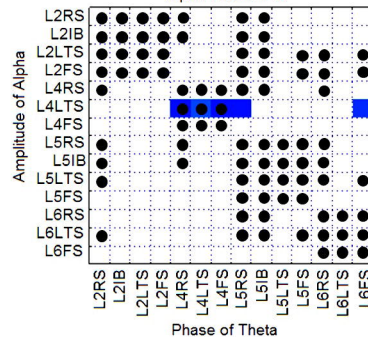

Beta-Theta APC

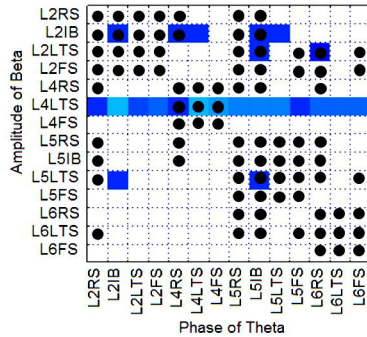

Gamma-Theta APC

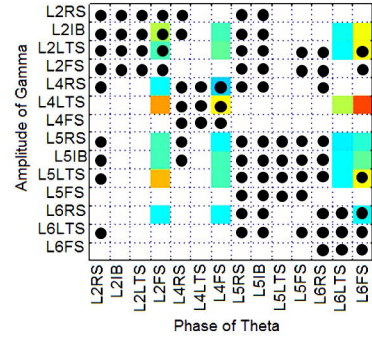

Gamma-Alpha APC

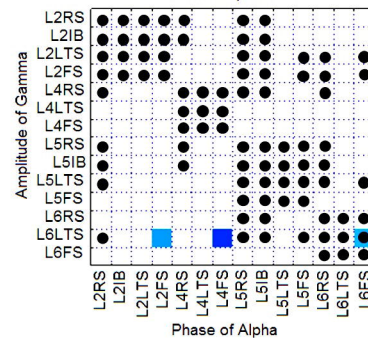

Gamma-Beta APC

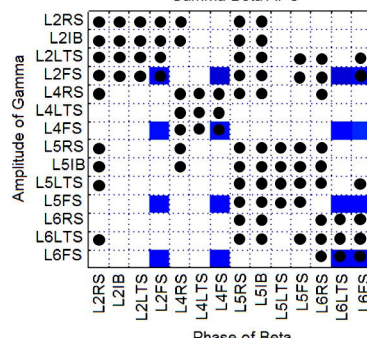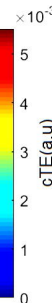

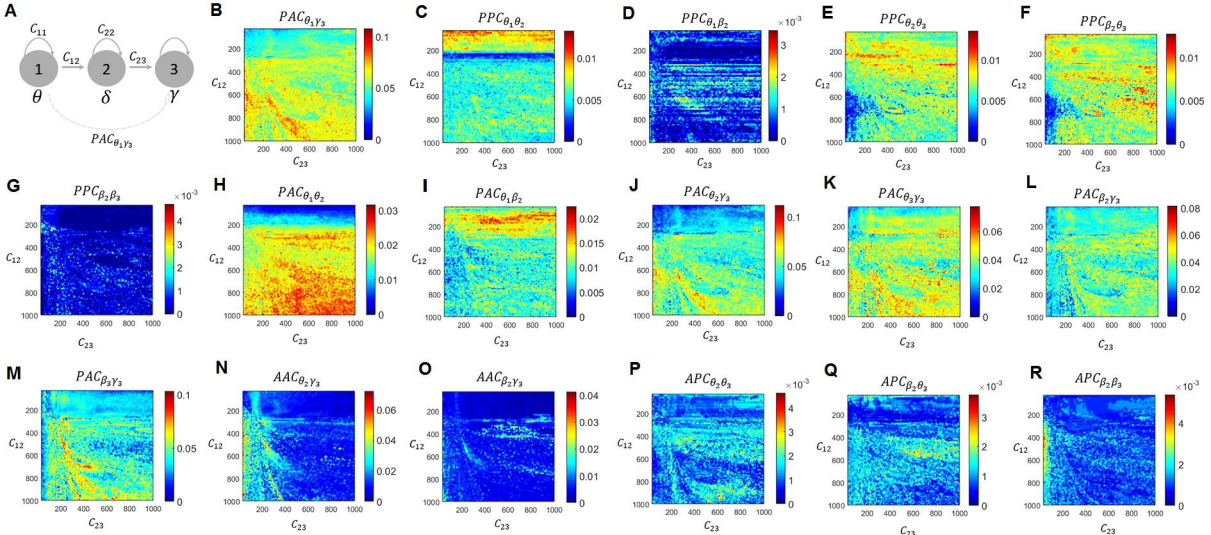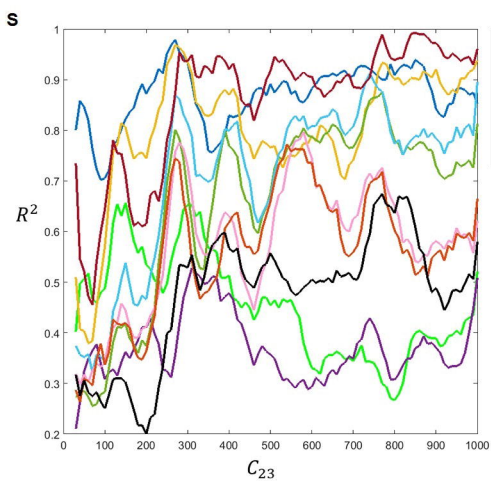

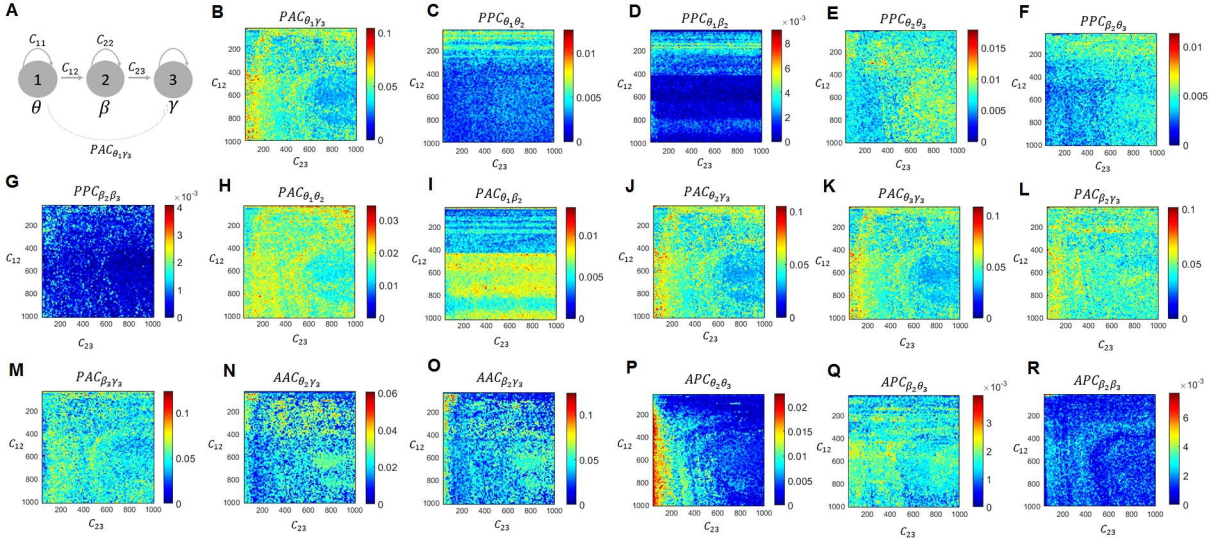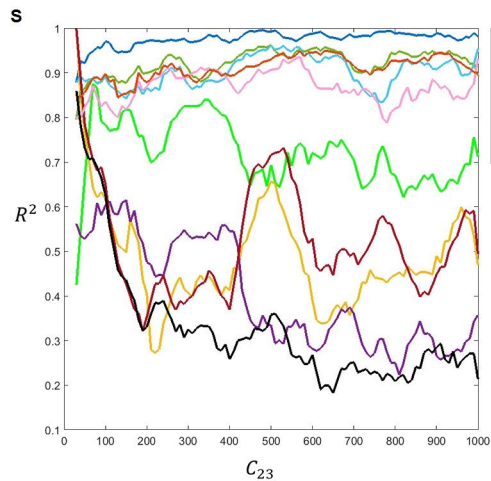

Source: http://biorxiv.org/content/10.1101/023291v2.full.pdf
